# Supplementary material for: Synthesis and photooxidation of styrene copolymer bearing camphorquinone pendant groups
Source: publisher site journal article supplement (doi:10.3762/bjoc.8.37), 2012-03-06

# Supporting Information File 2

for

## Synthesis and photooxidation of styrene copolymer bearing camphorquinone pendant groups

Branislav Husár<sup>\*1</sup>, Norbert Moszner<sup>2</sup> and Ivan Lukáč<sup>1</sup>

Address: <sup>1</sup>Polymer Institute, Slovak Academy of Sciences, Dúbravská cesta 9,  
SK-845 41 Bratislava 45, Slovakia and <sup>2</sup>Ivoclar Vivadent AG, Bendererstrasse 2,  
FL-9494 Schaan, Liechtenstein

Email: Branislav Husár\* - [branislav.husar@savba.sk](mailto:branislav.husar@savba.sk); Norbert Moszner -  
[norbert.moszner@ivoclarvivadent.com](mailto:norbert.moszner@ivoclarvivadent.com); Ivan Lukáč - [ivan.lukac@savba.sk](mailto:ivan.lukac@savba.sk)

\* Corresponding author

## NMR spectra of compounds 5–10 and MCQ

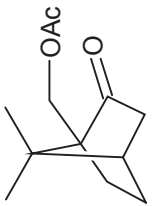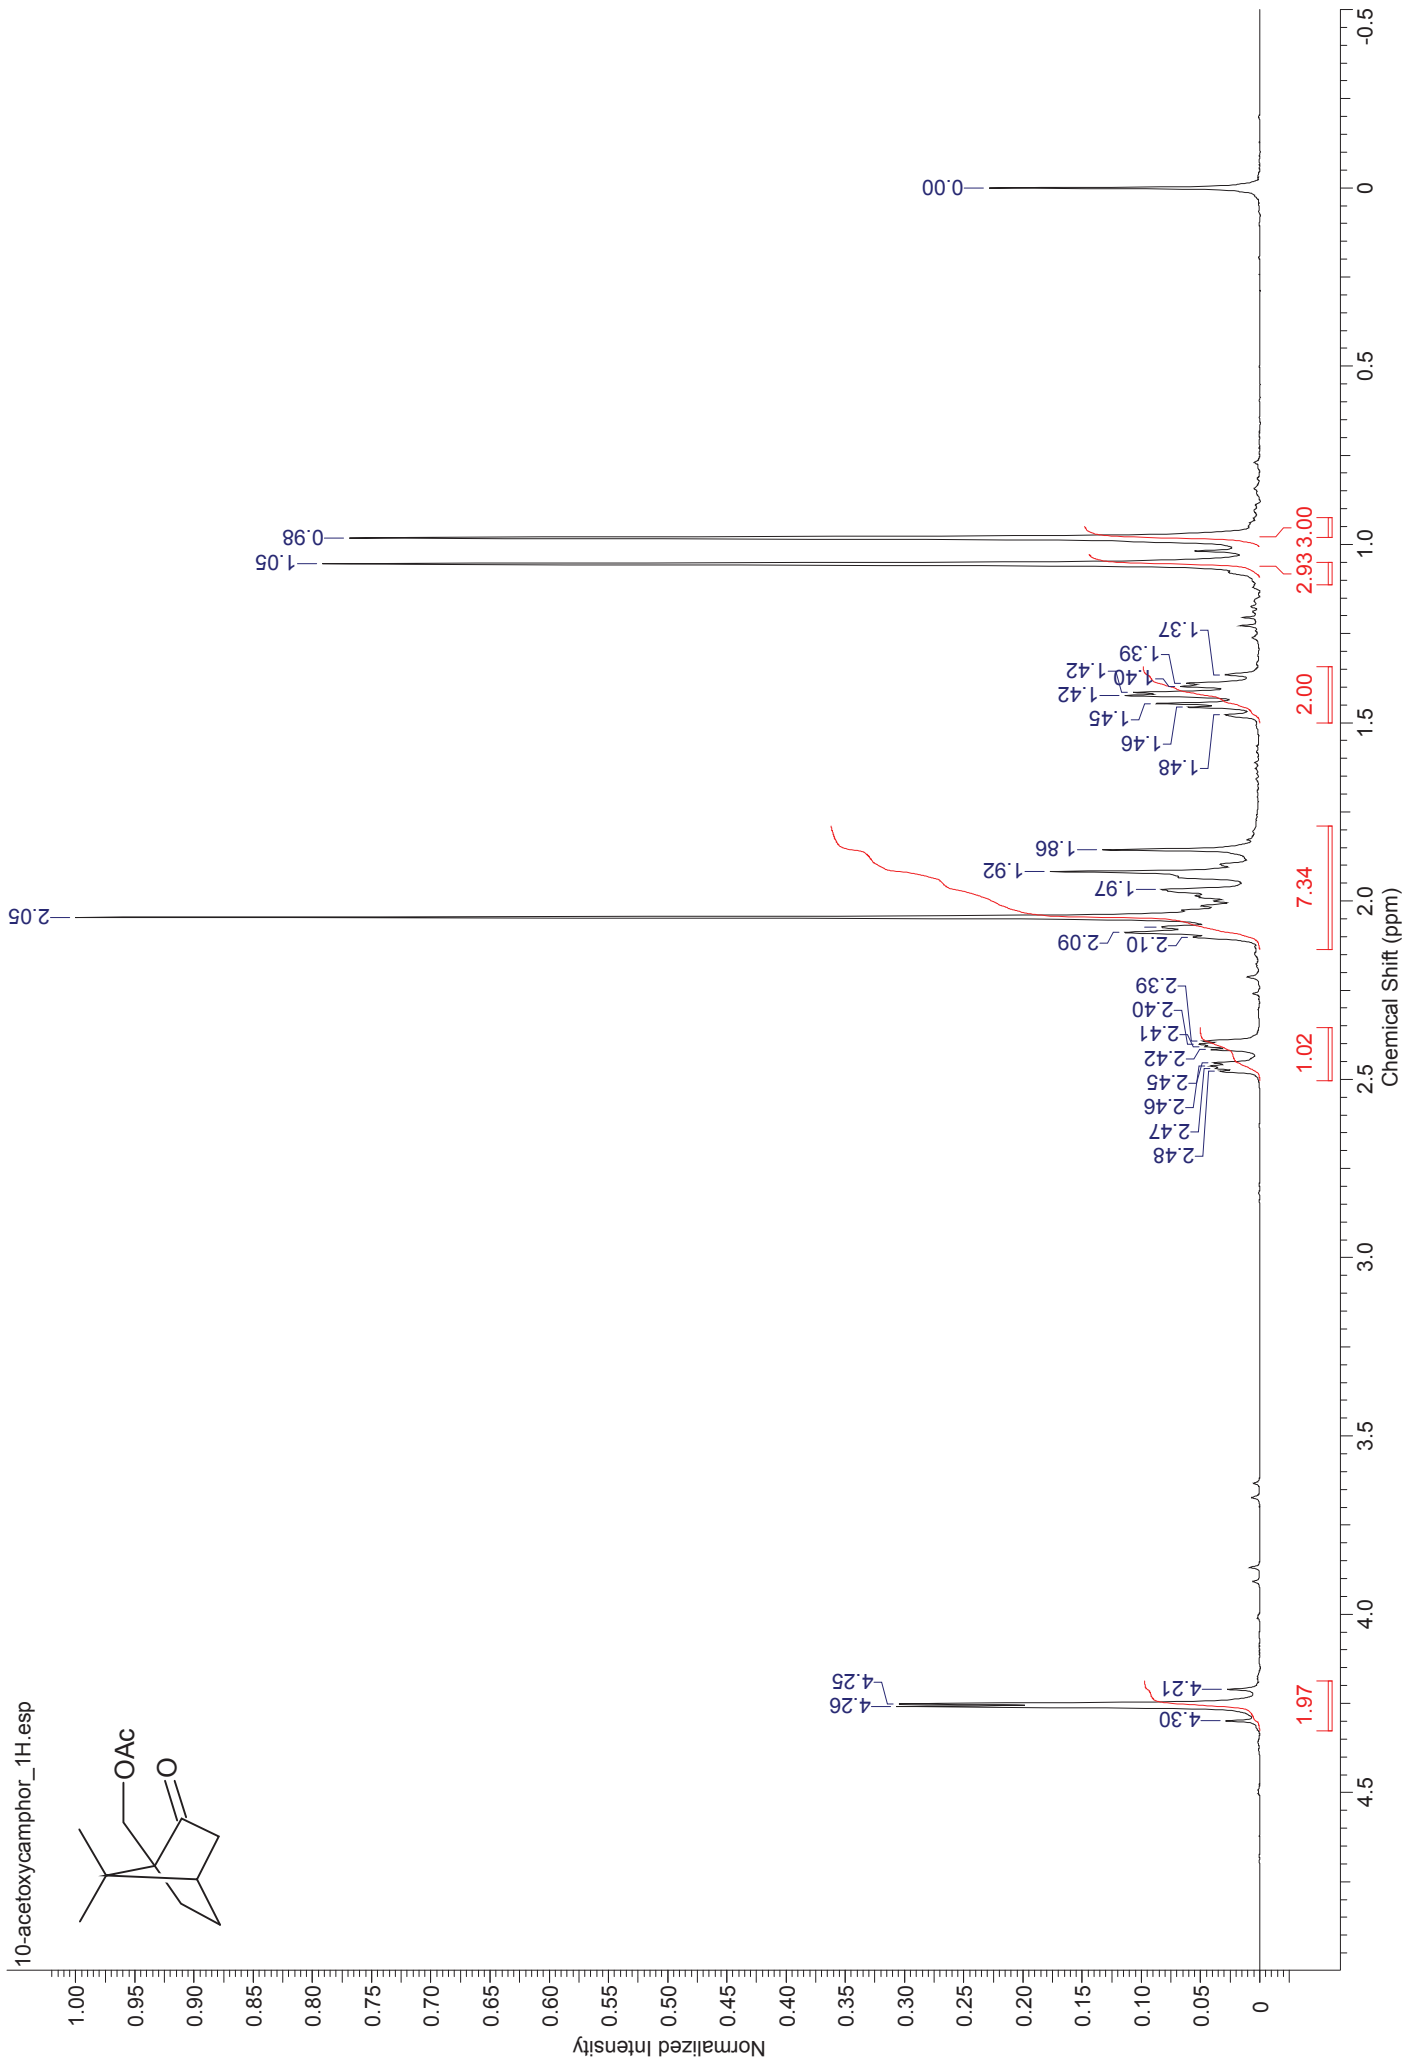

10-acetoxycamphor\_13C.esp

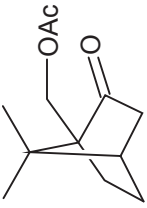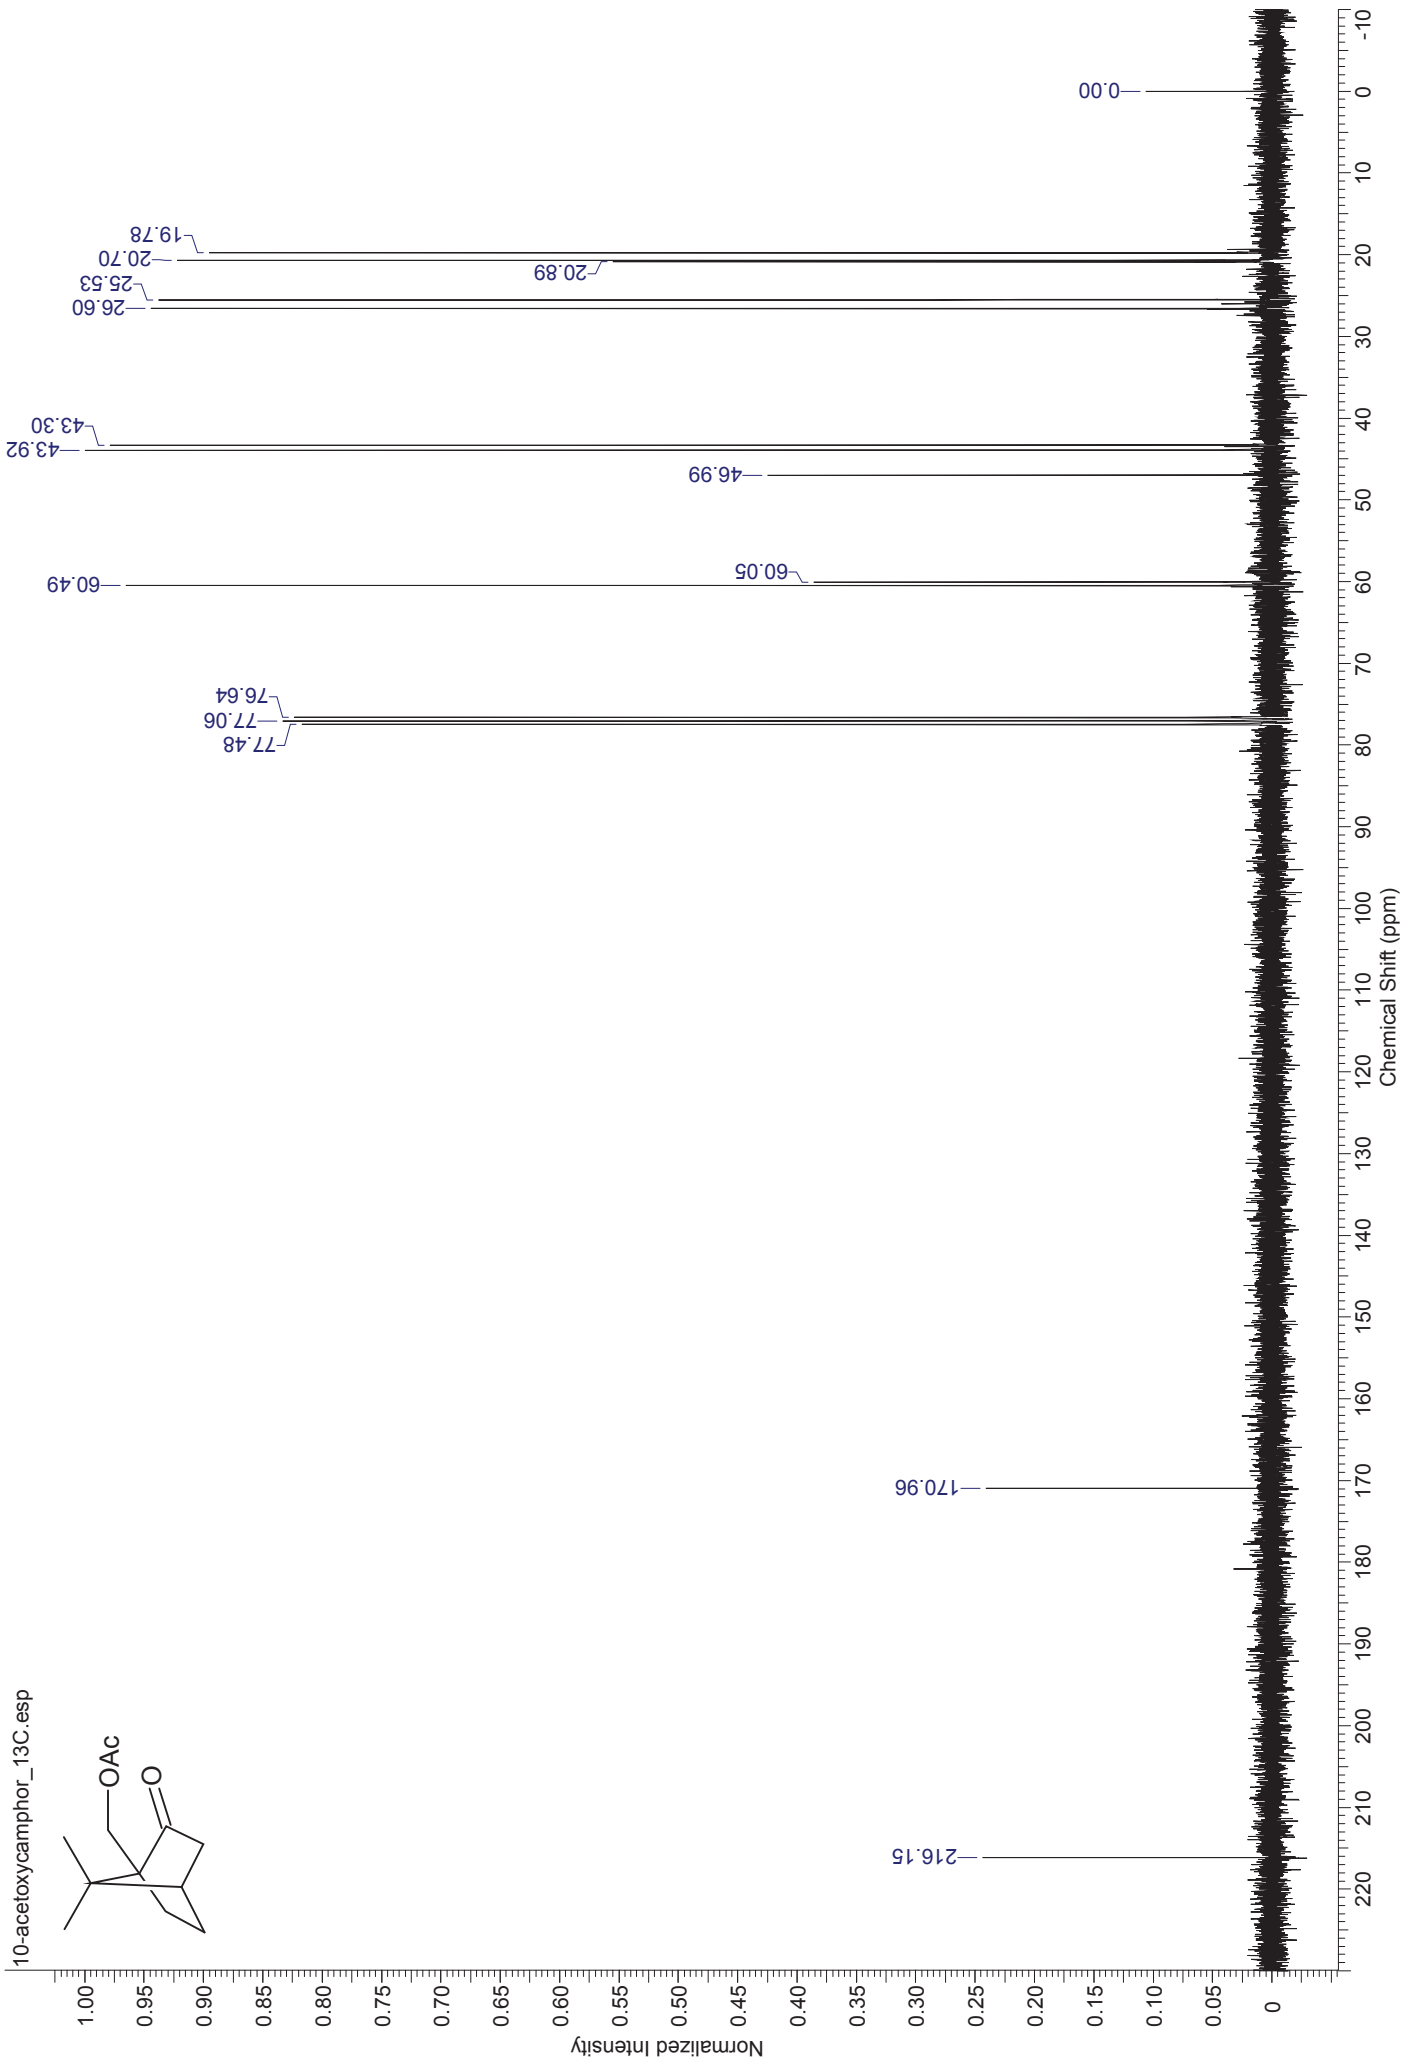

10-acetoxycamphorquinone\_1H.esp

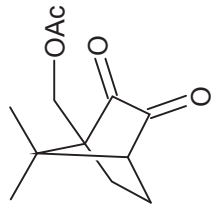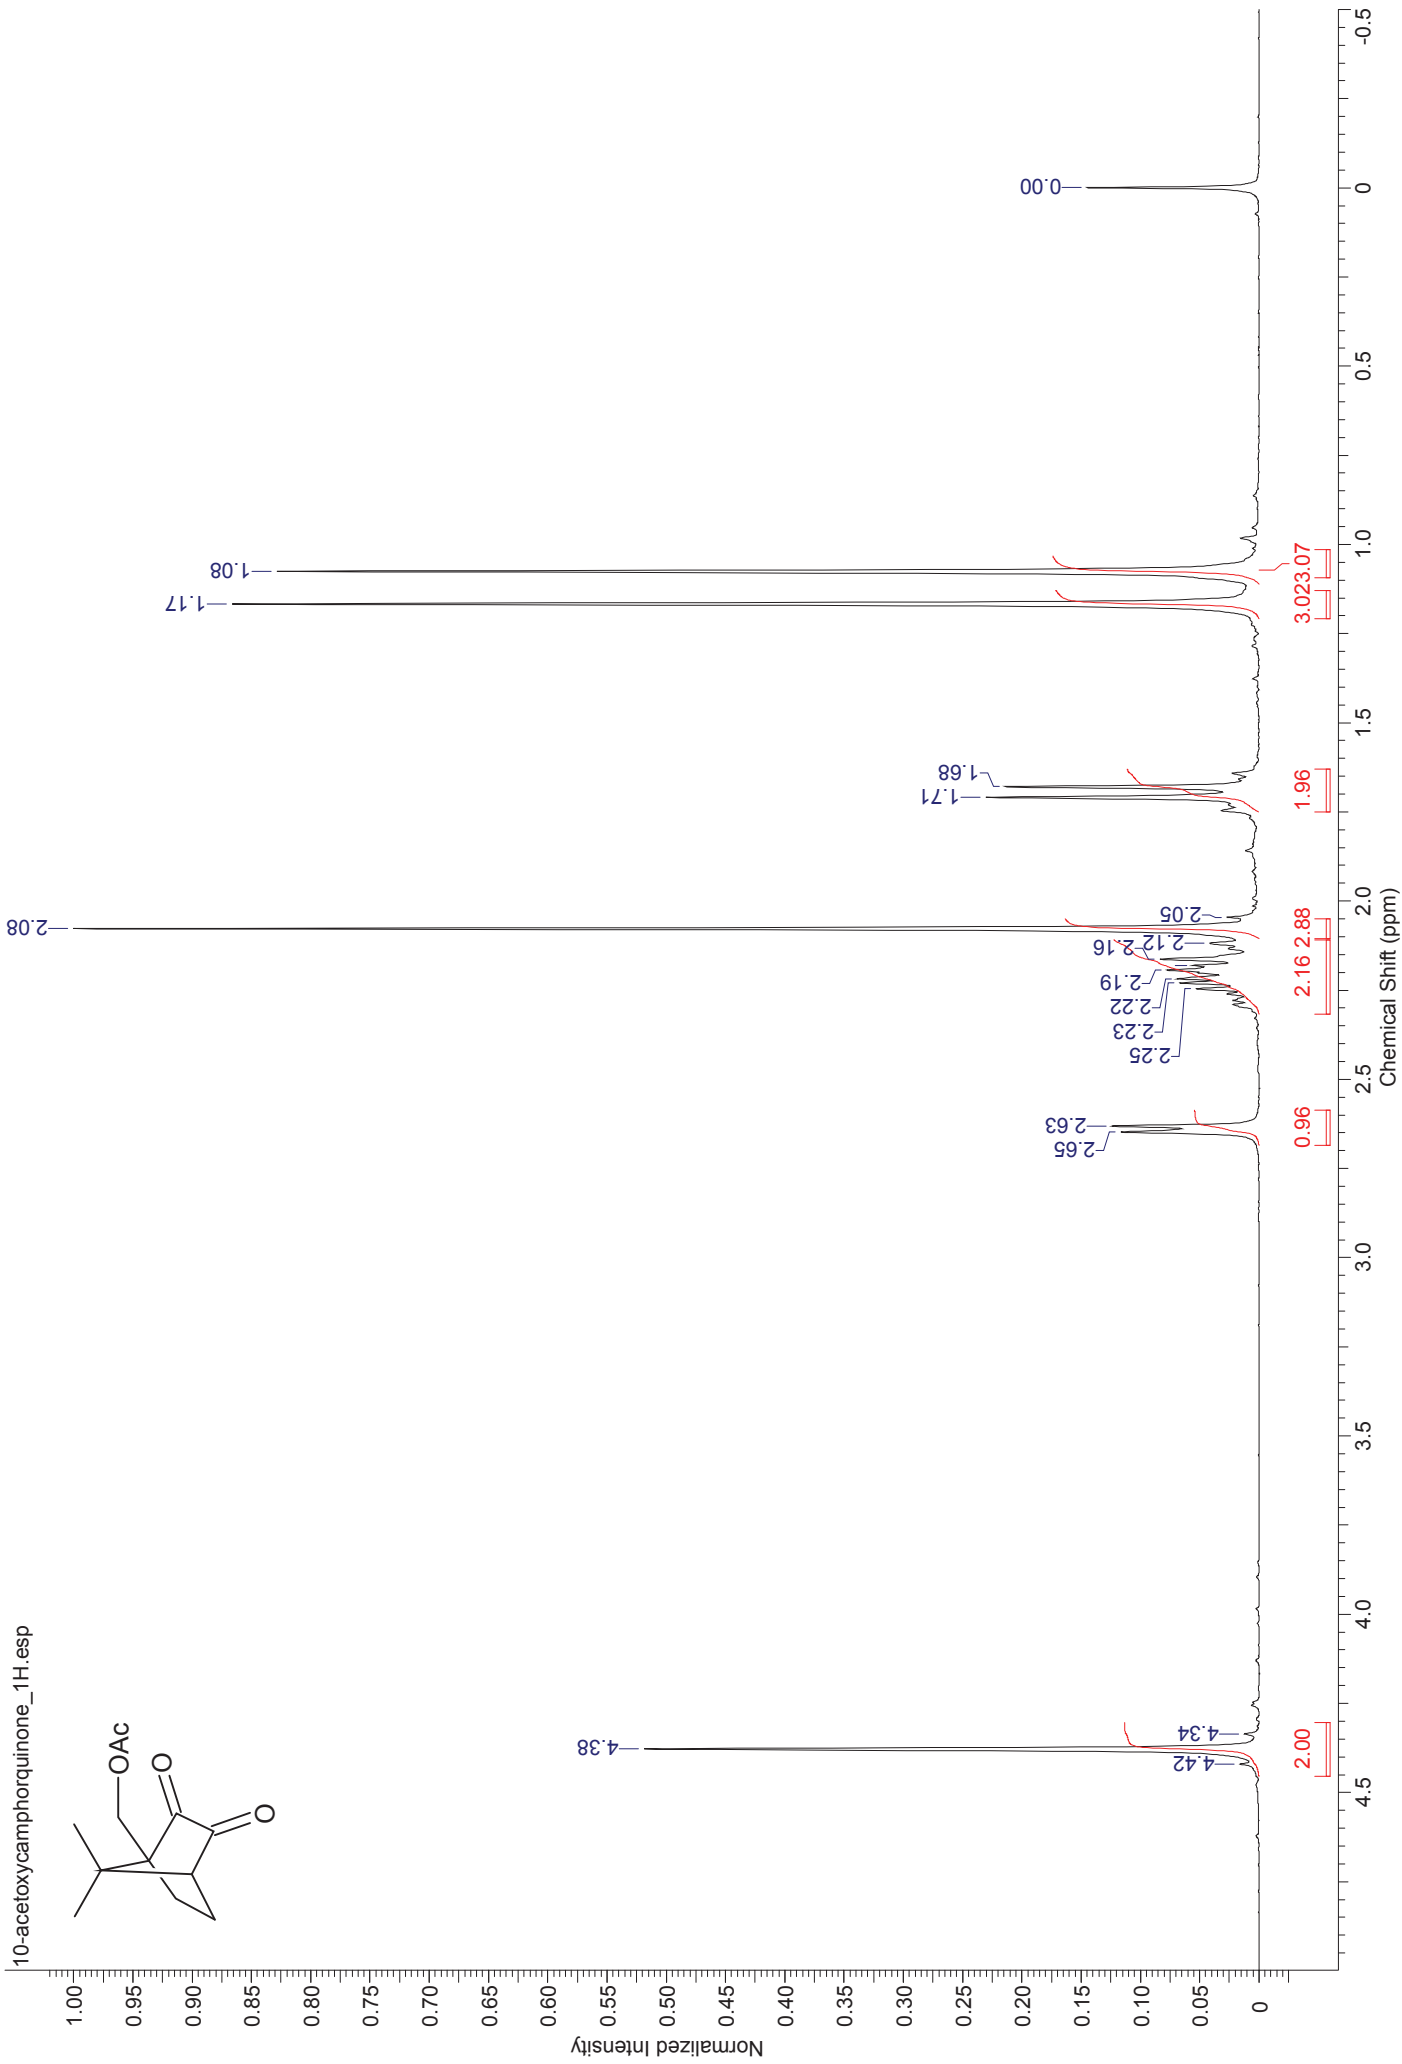

10-ACETOXYCAMPHORQUINONE\_13C.ESP

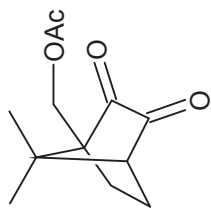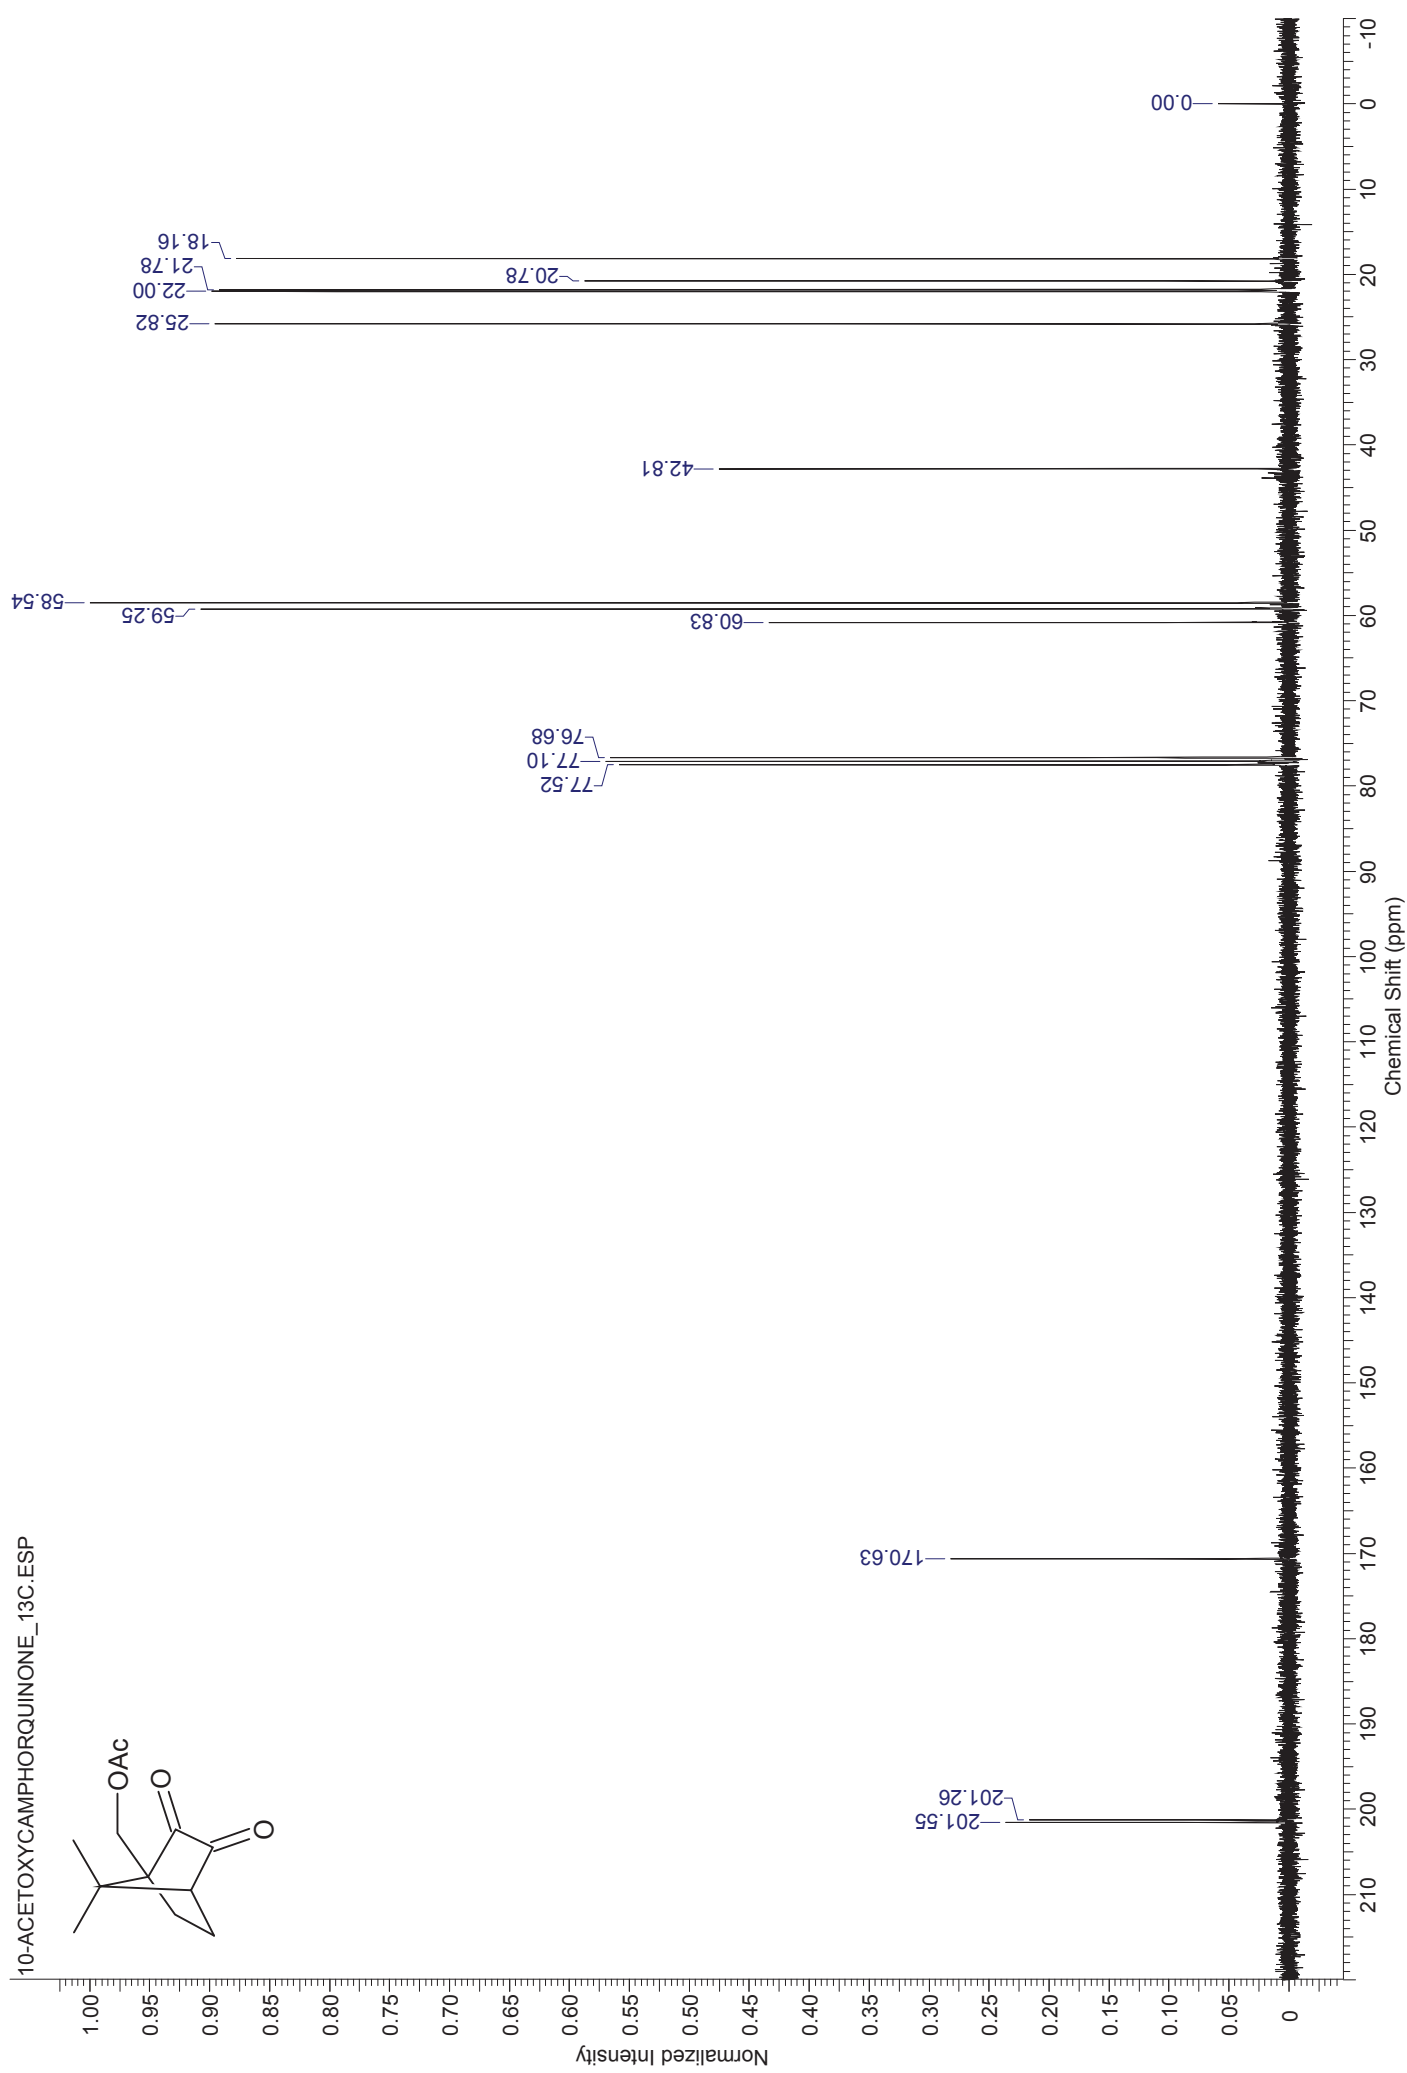

10-HYDROXYCAMPHORQUINONE\_1H.ESP

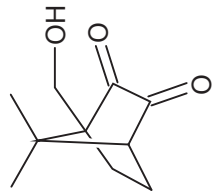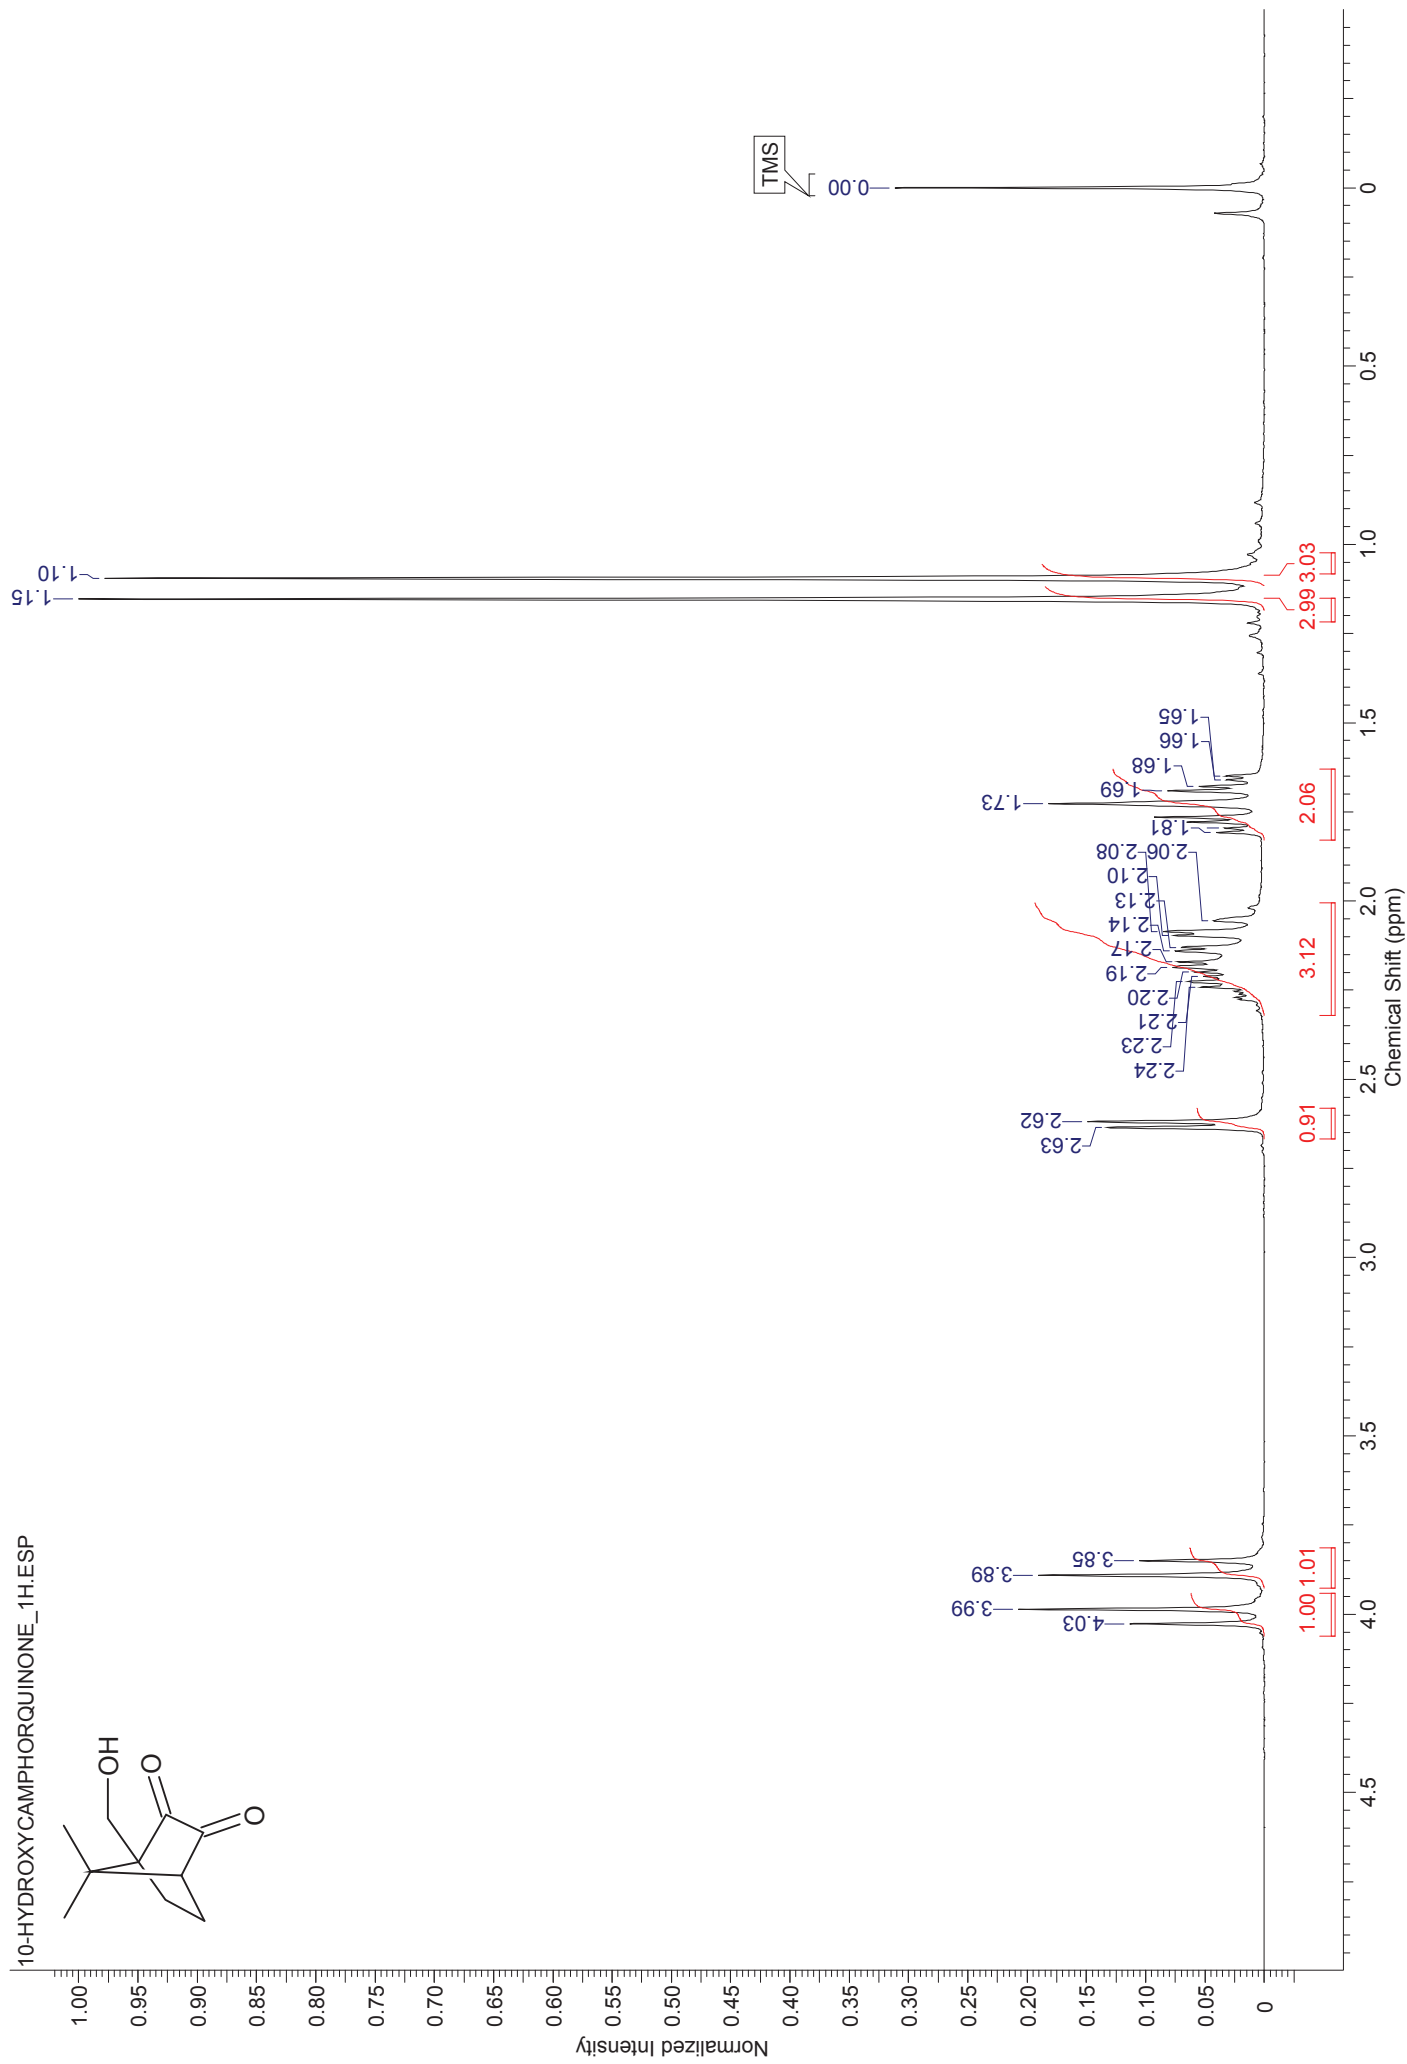

10-hydroxycamphorquinone\_13C.esp

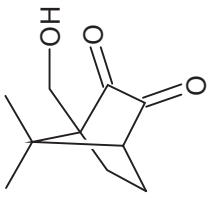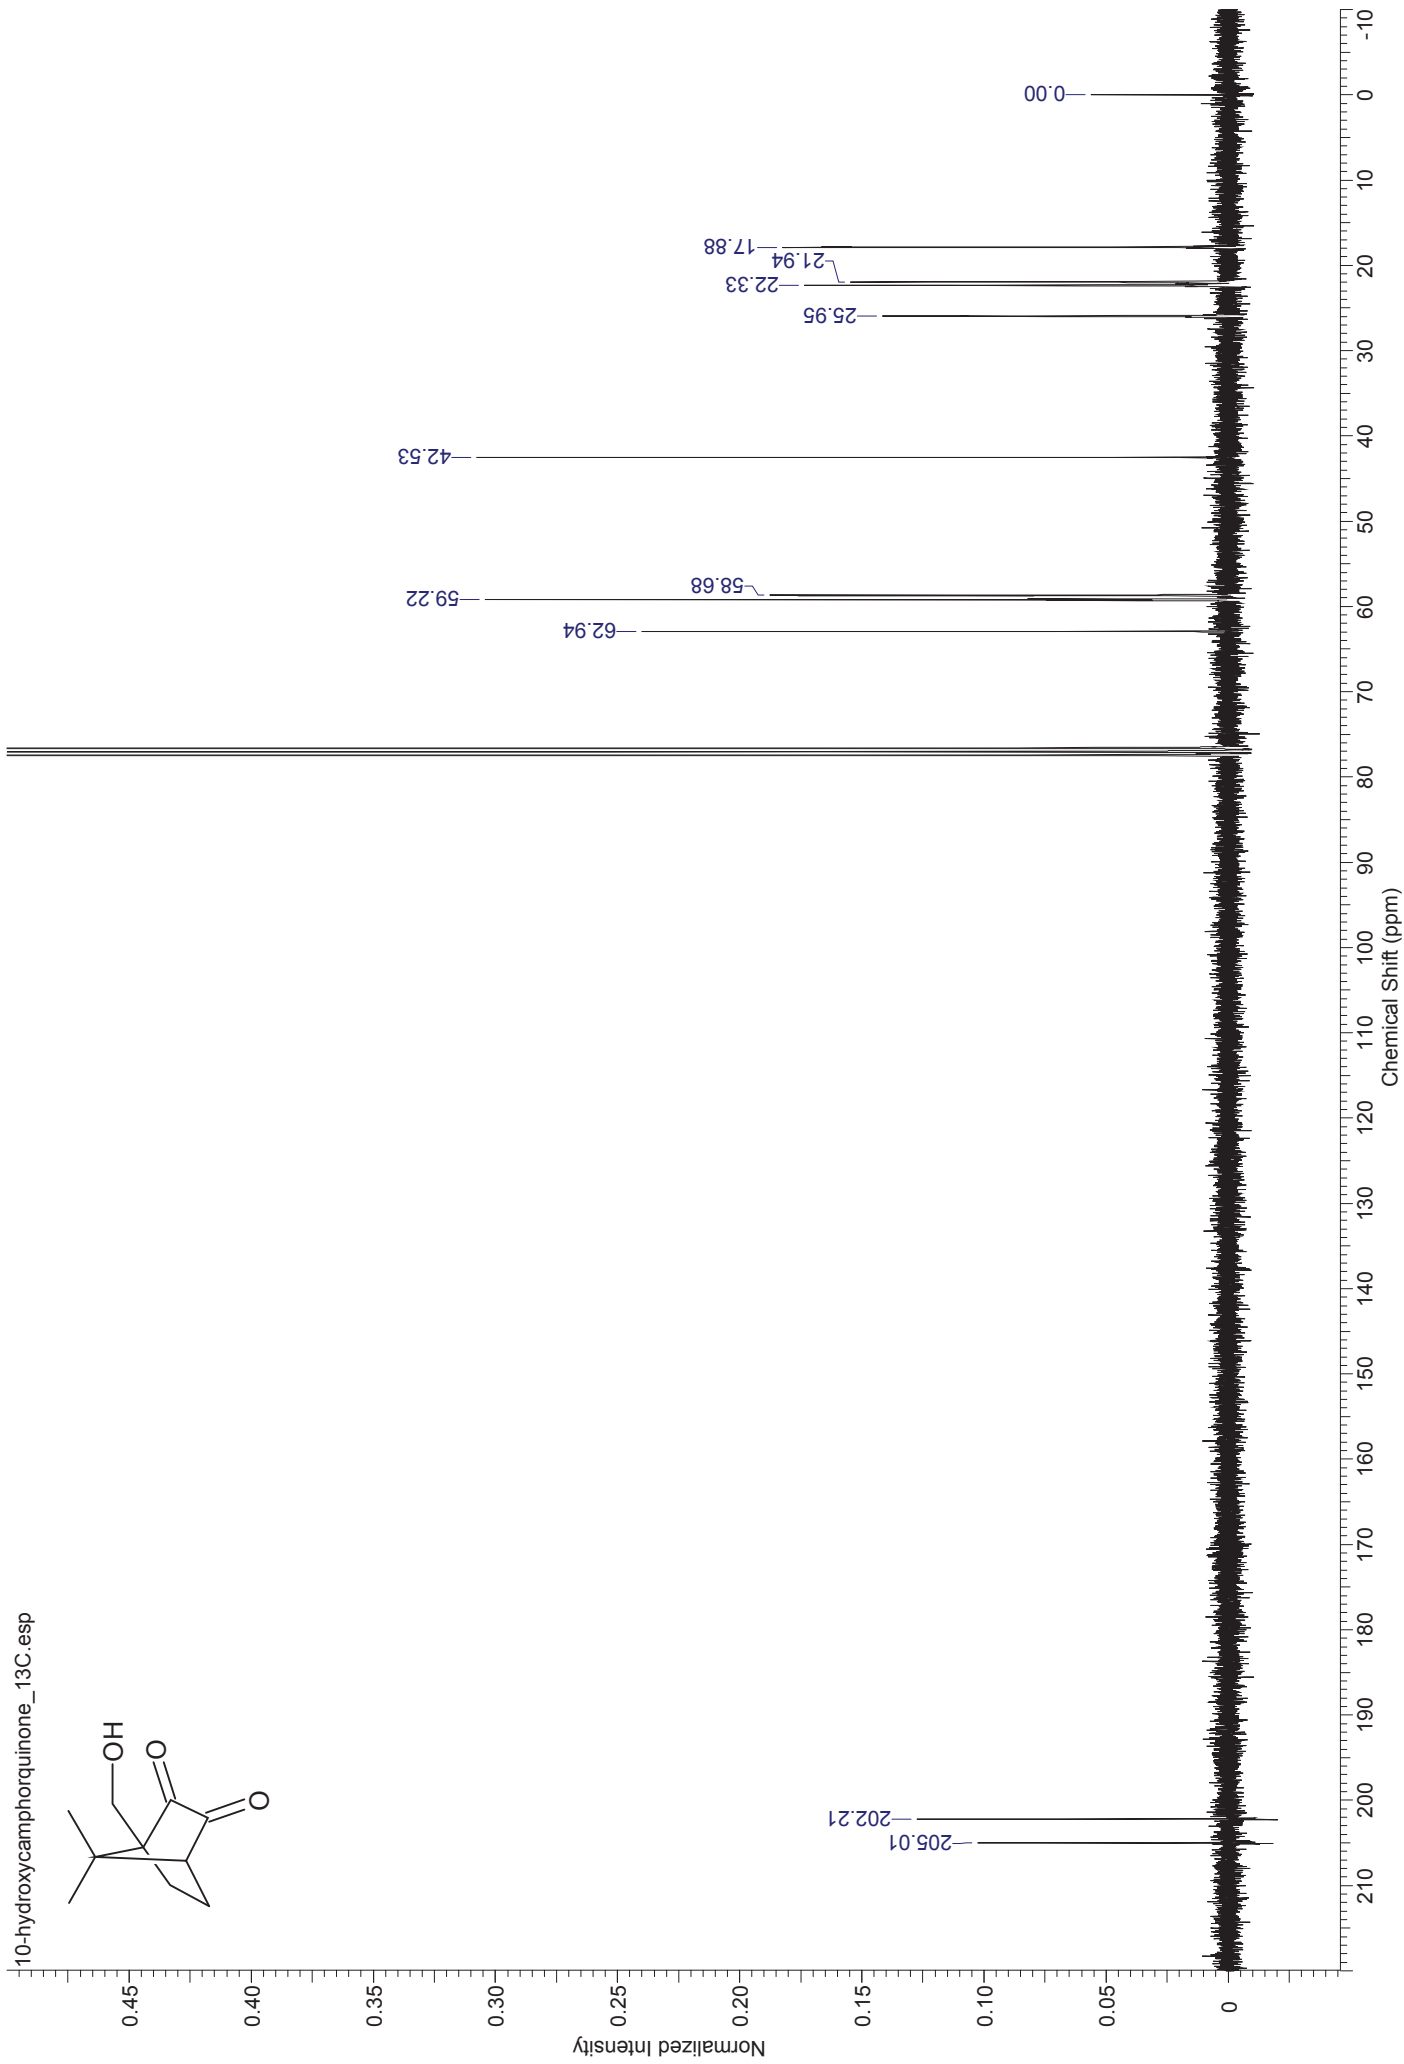

10-iodocamphor\_1H.esp

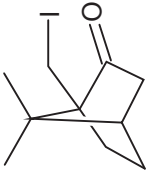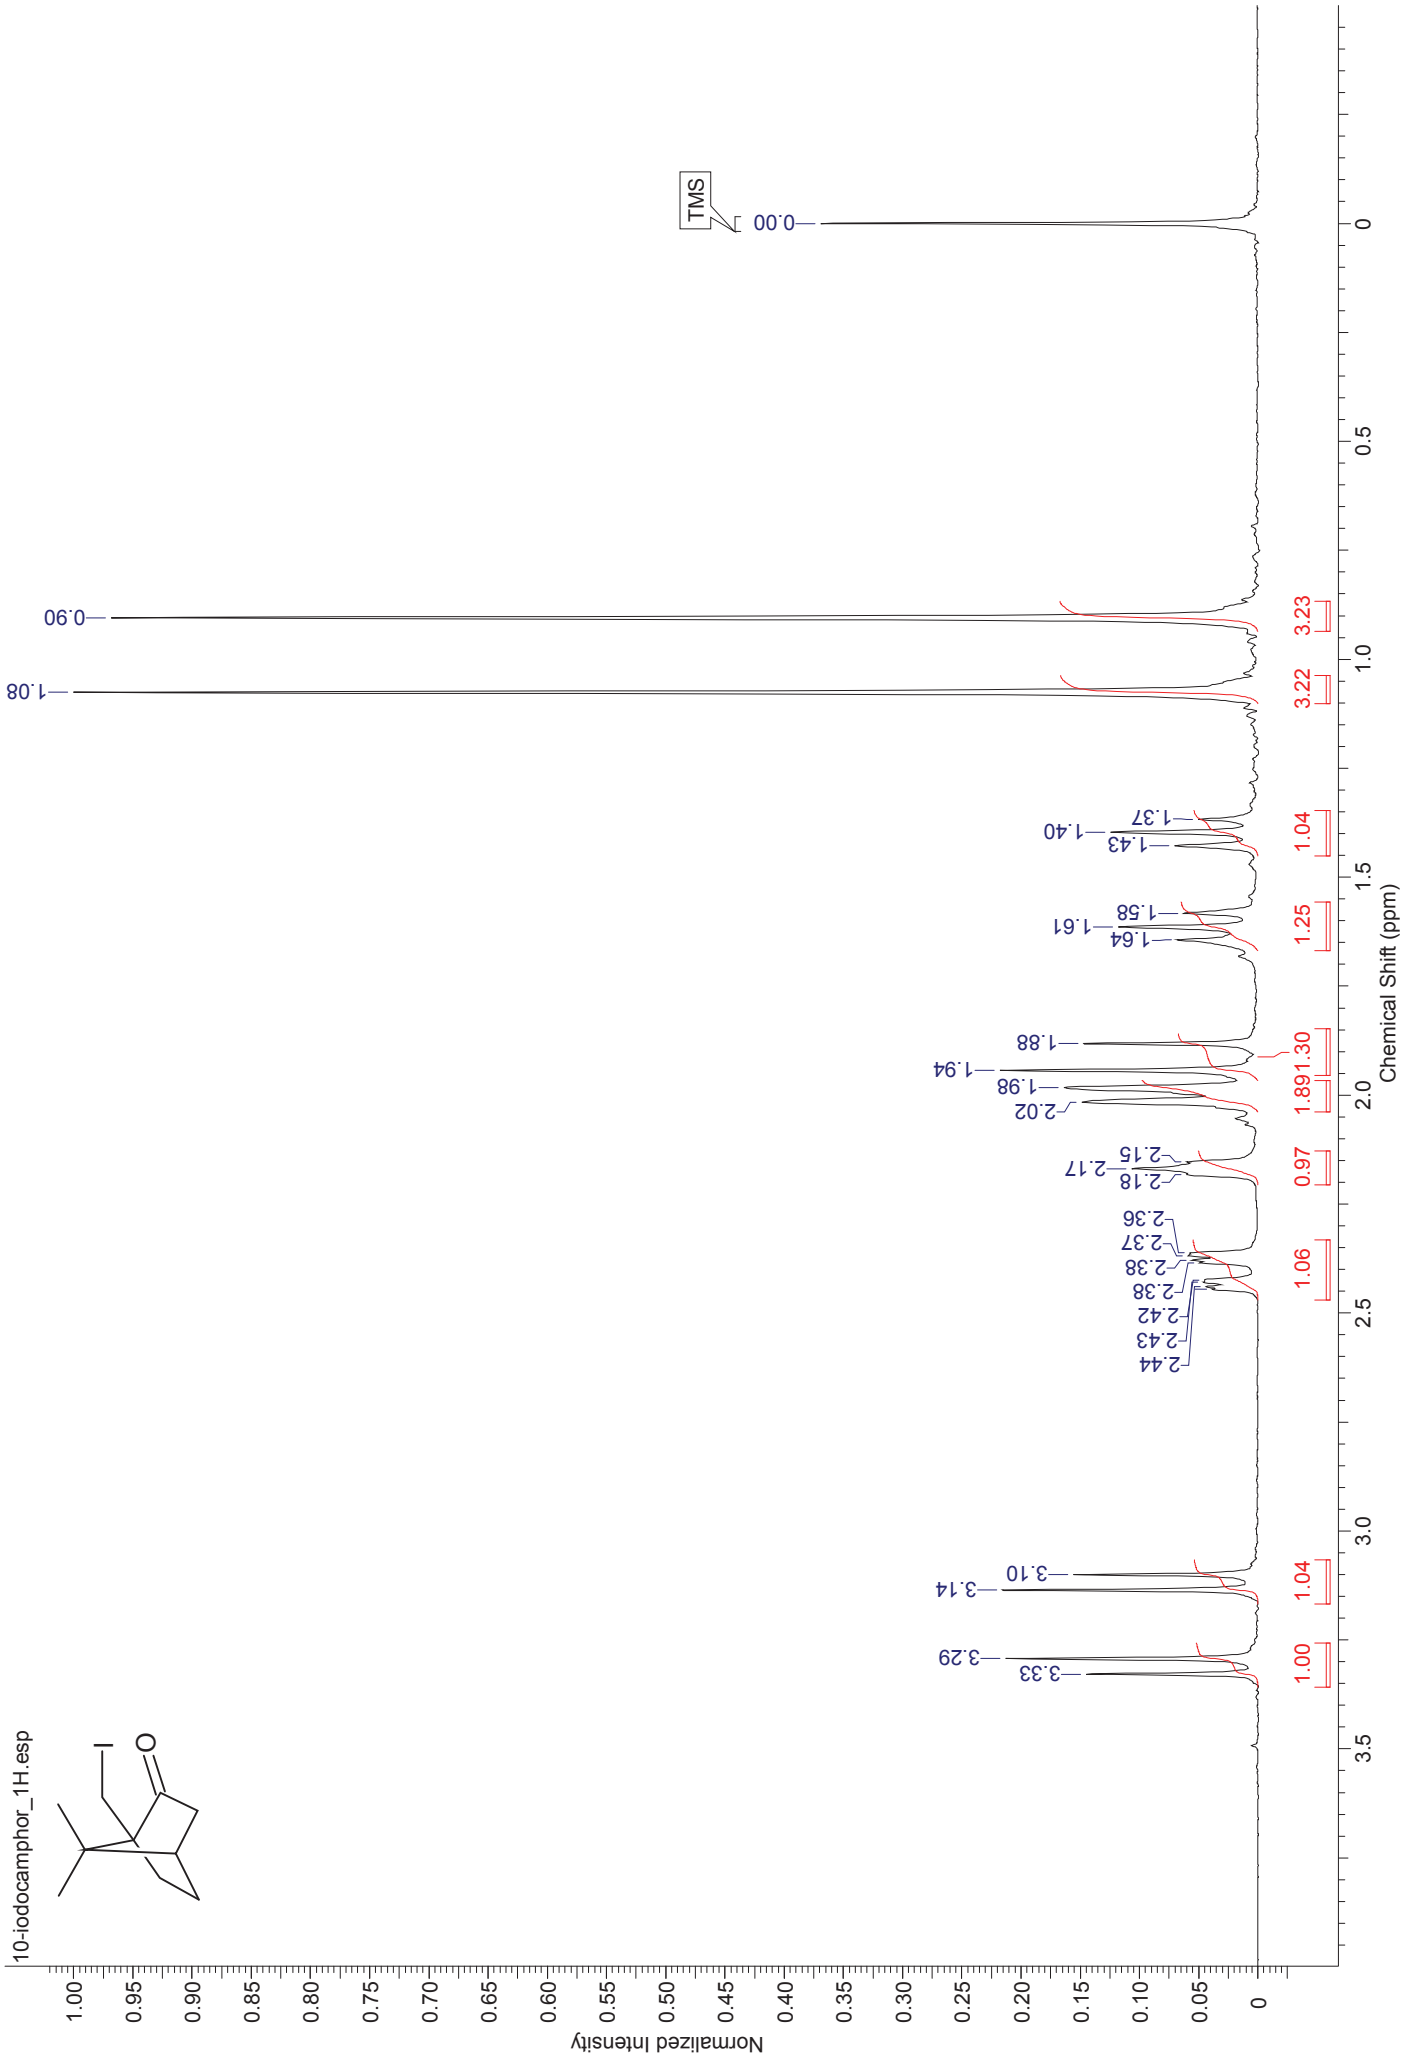



10-iodocamphor\_13C.esp

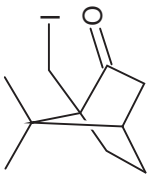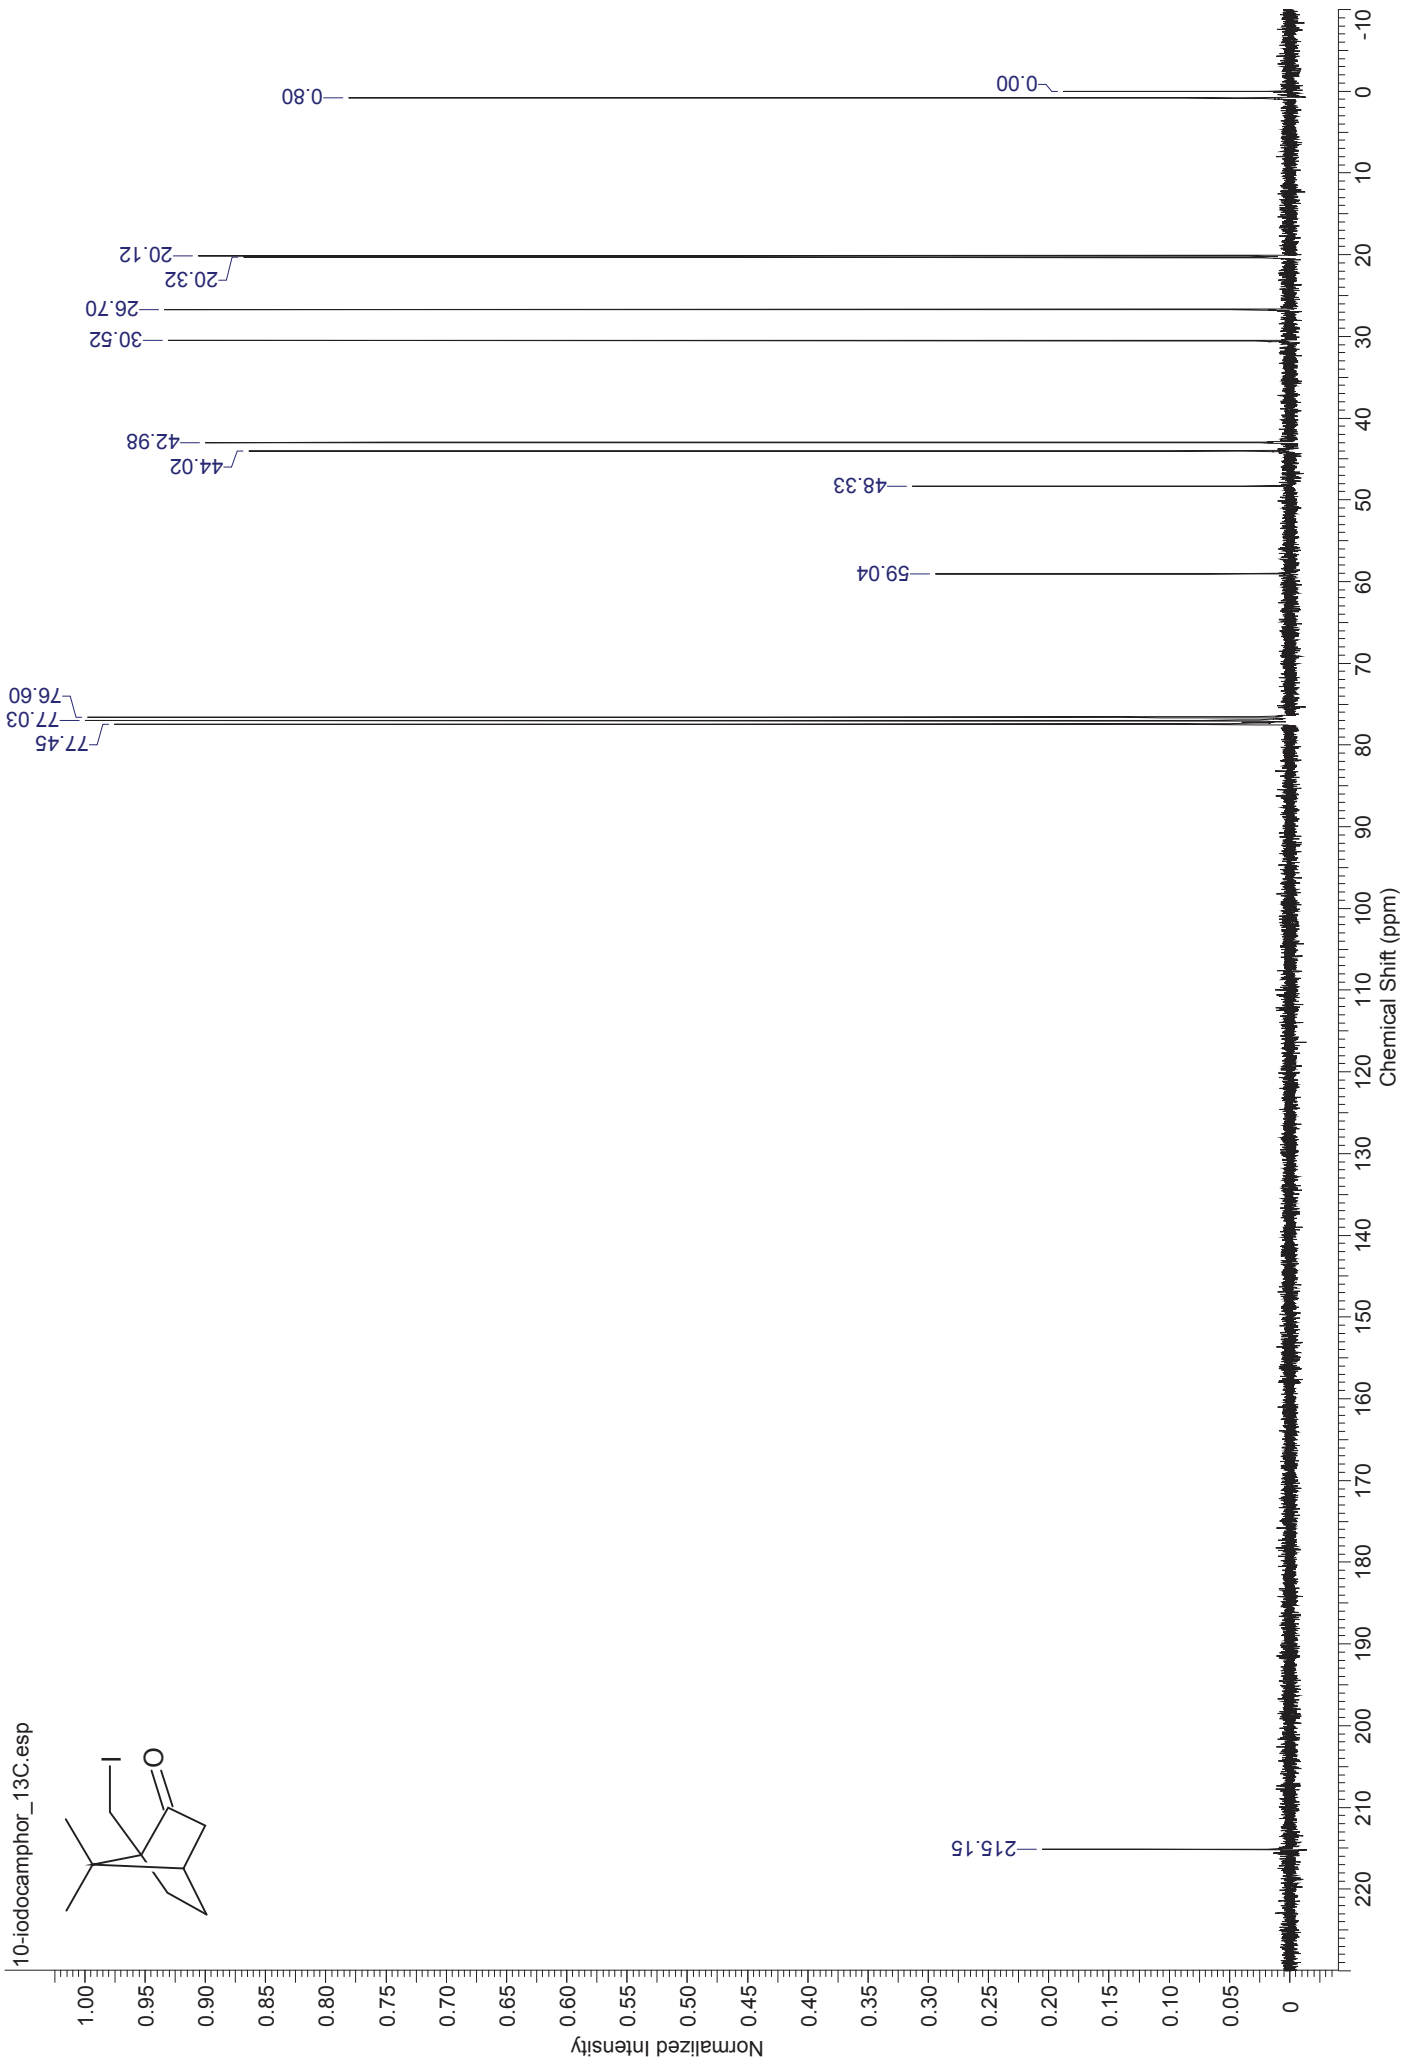

10-iodocamphorquinone\_1H.esp

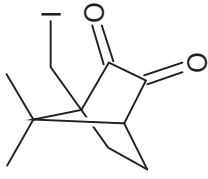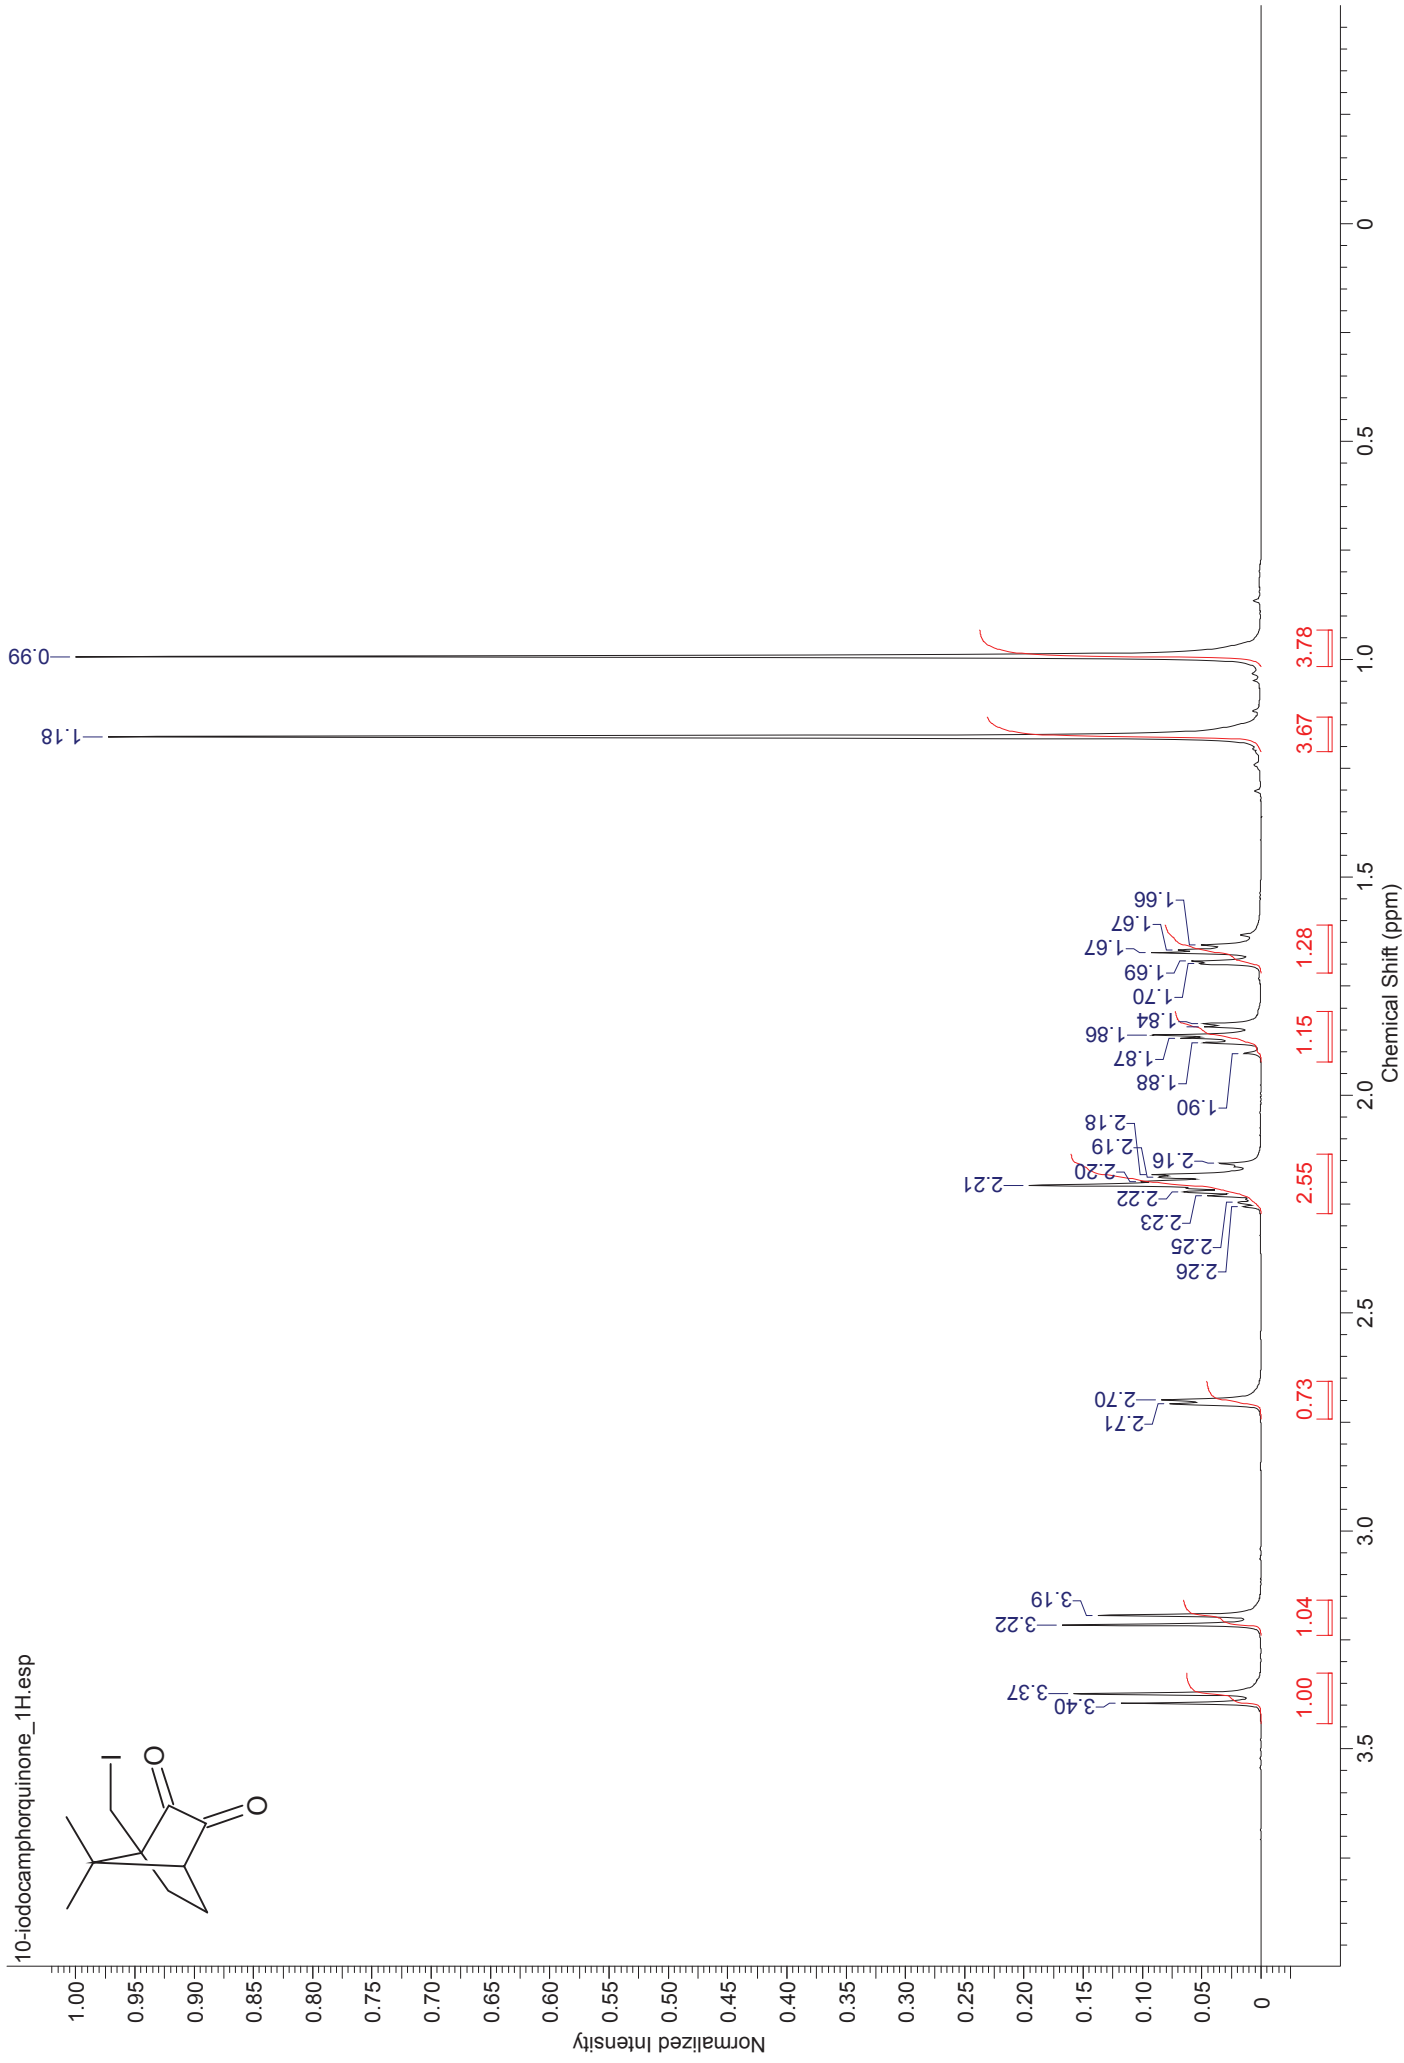

10-iodocamphorquinone.005.esp

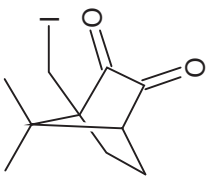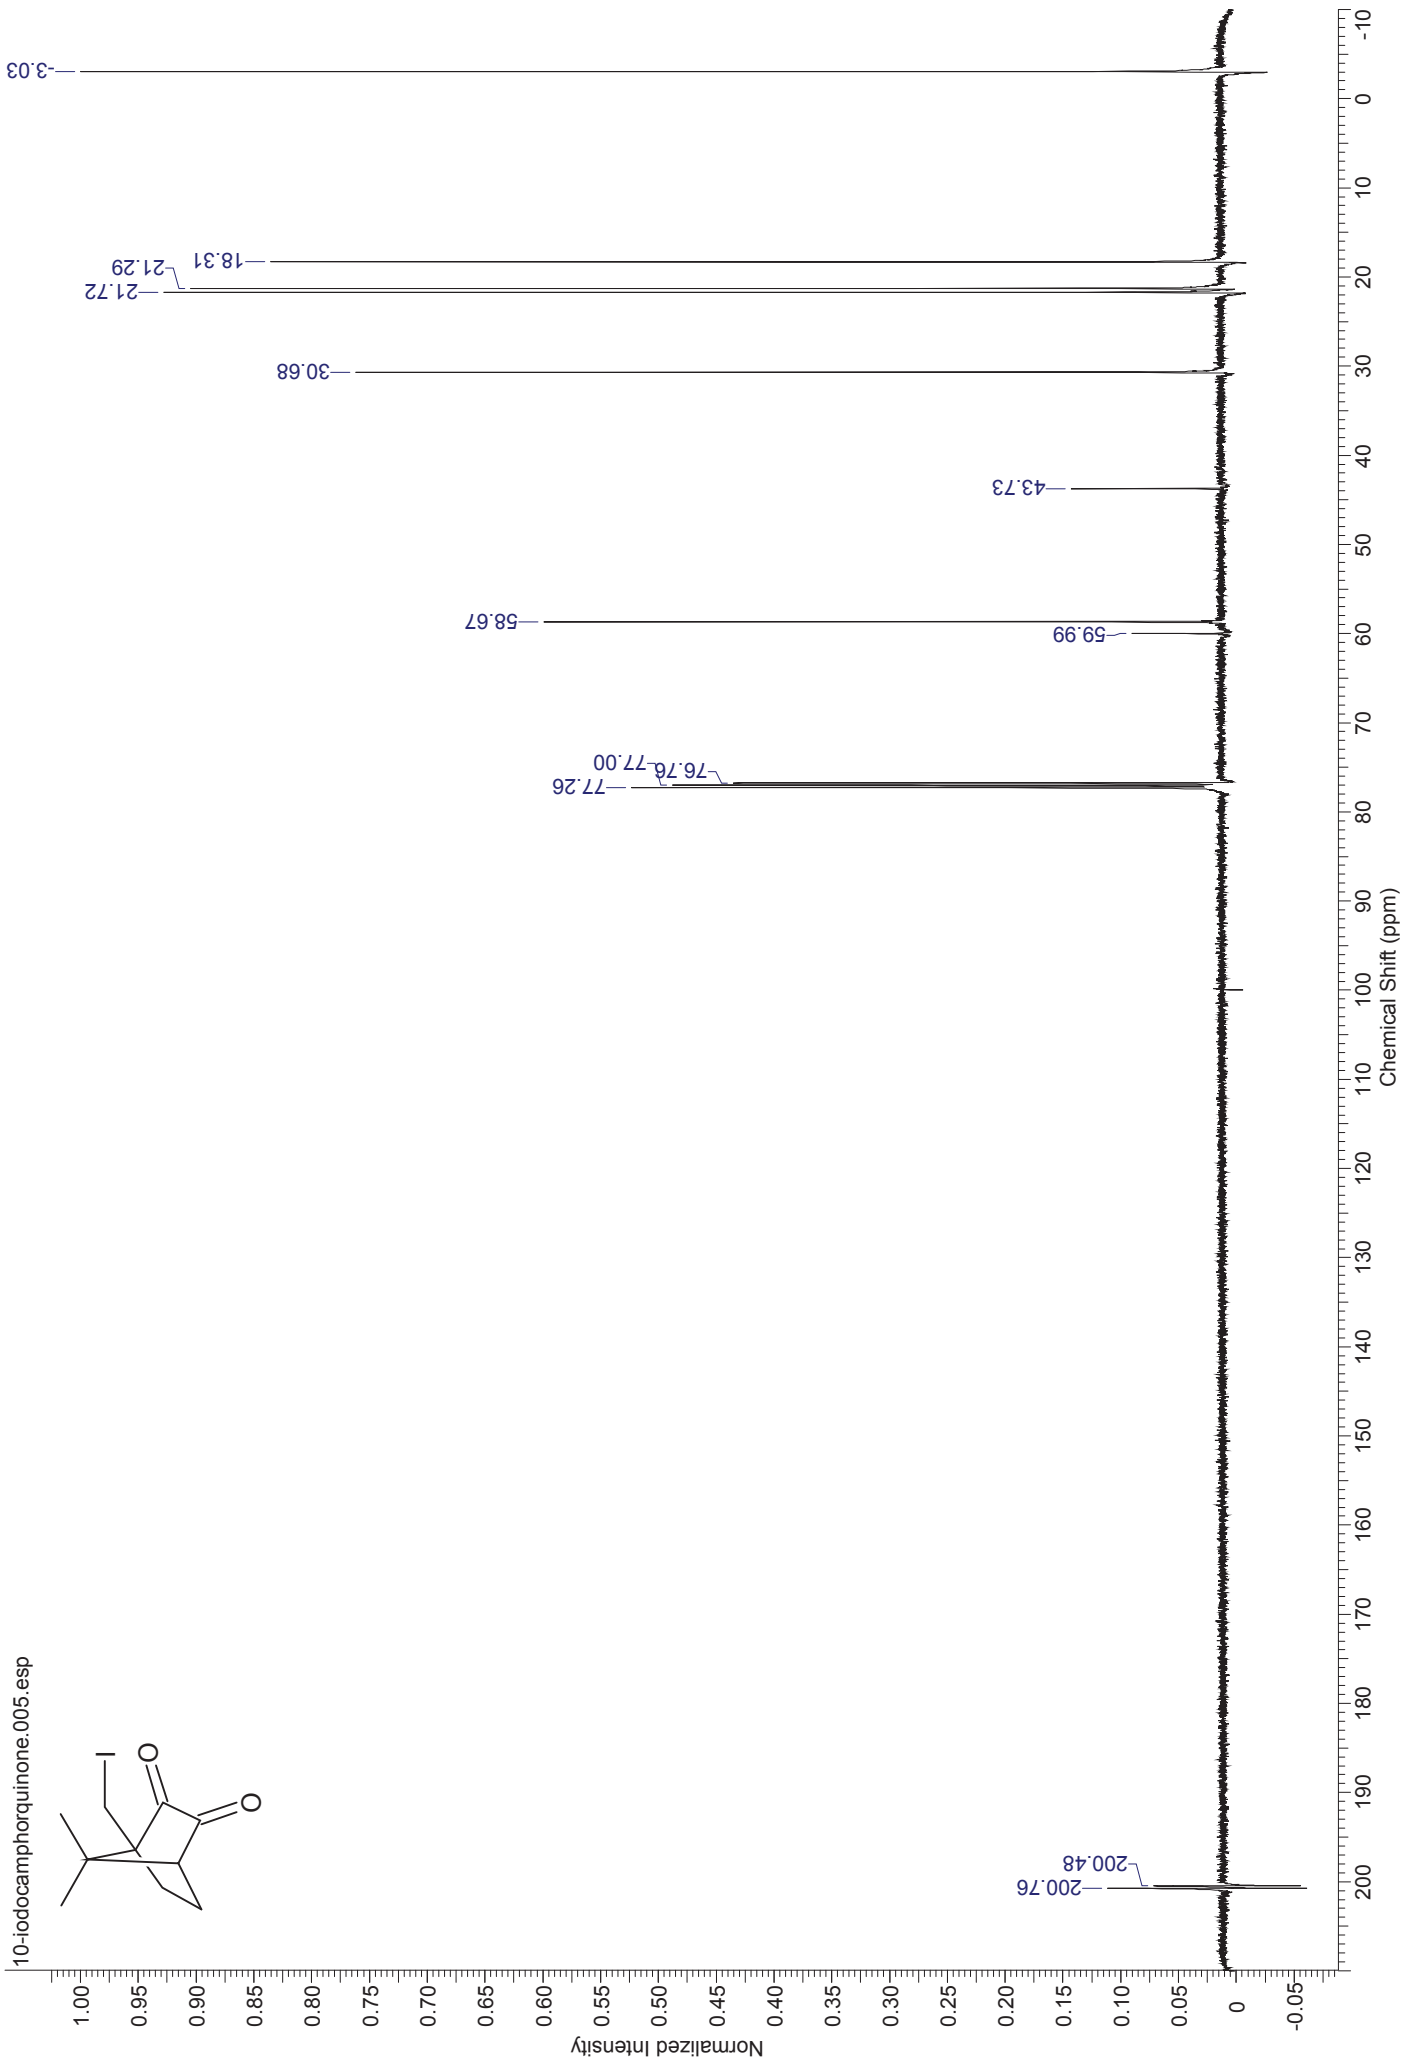

10-iodocamphorquinone\_COSY.esp

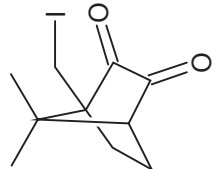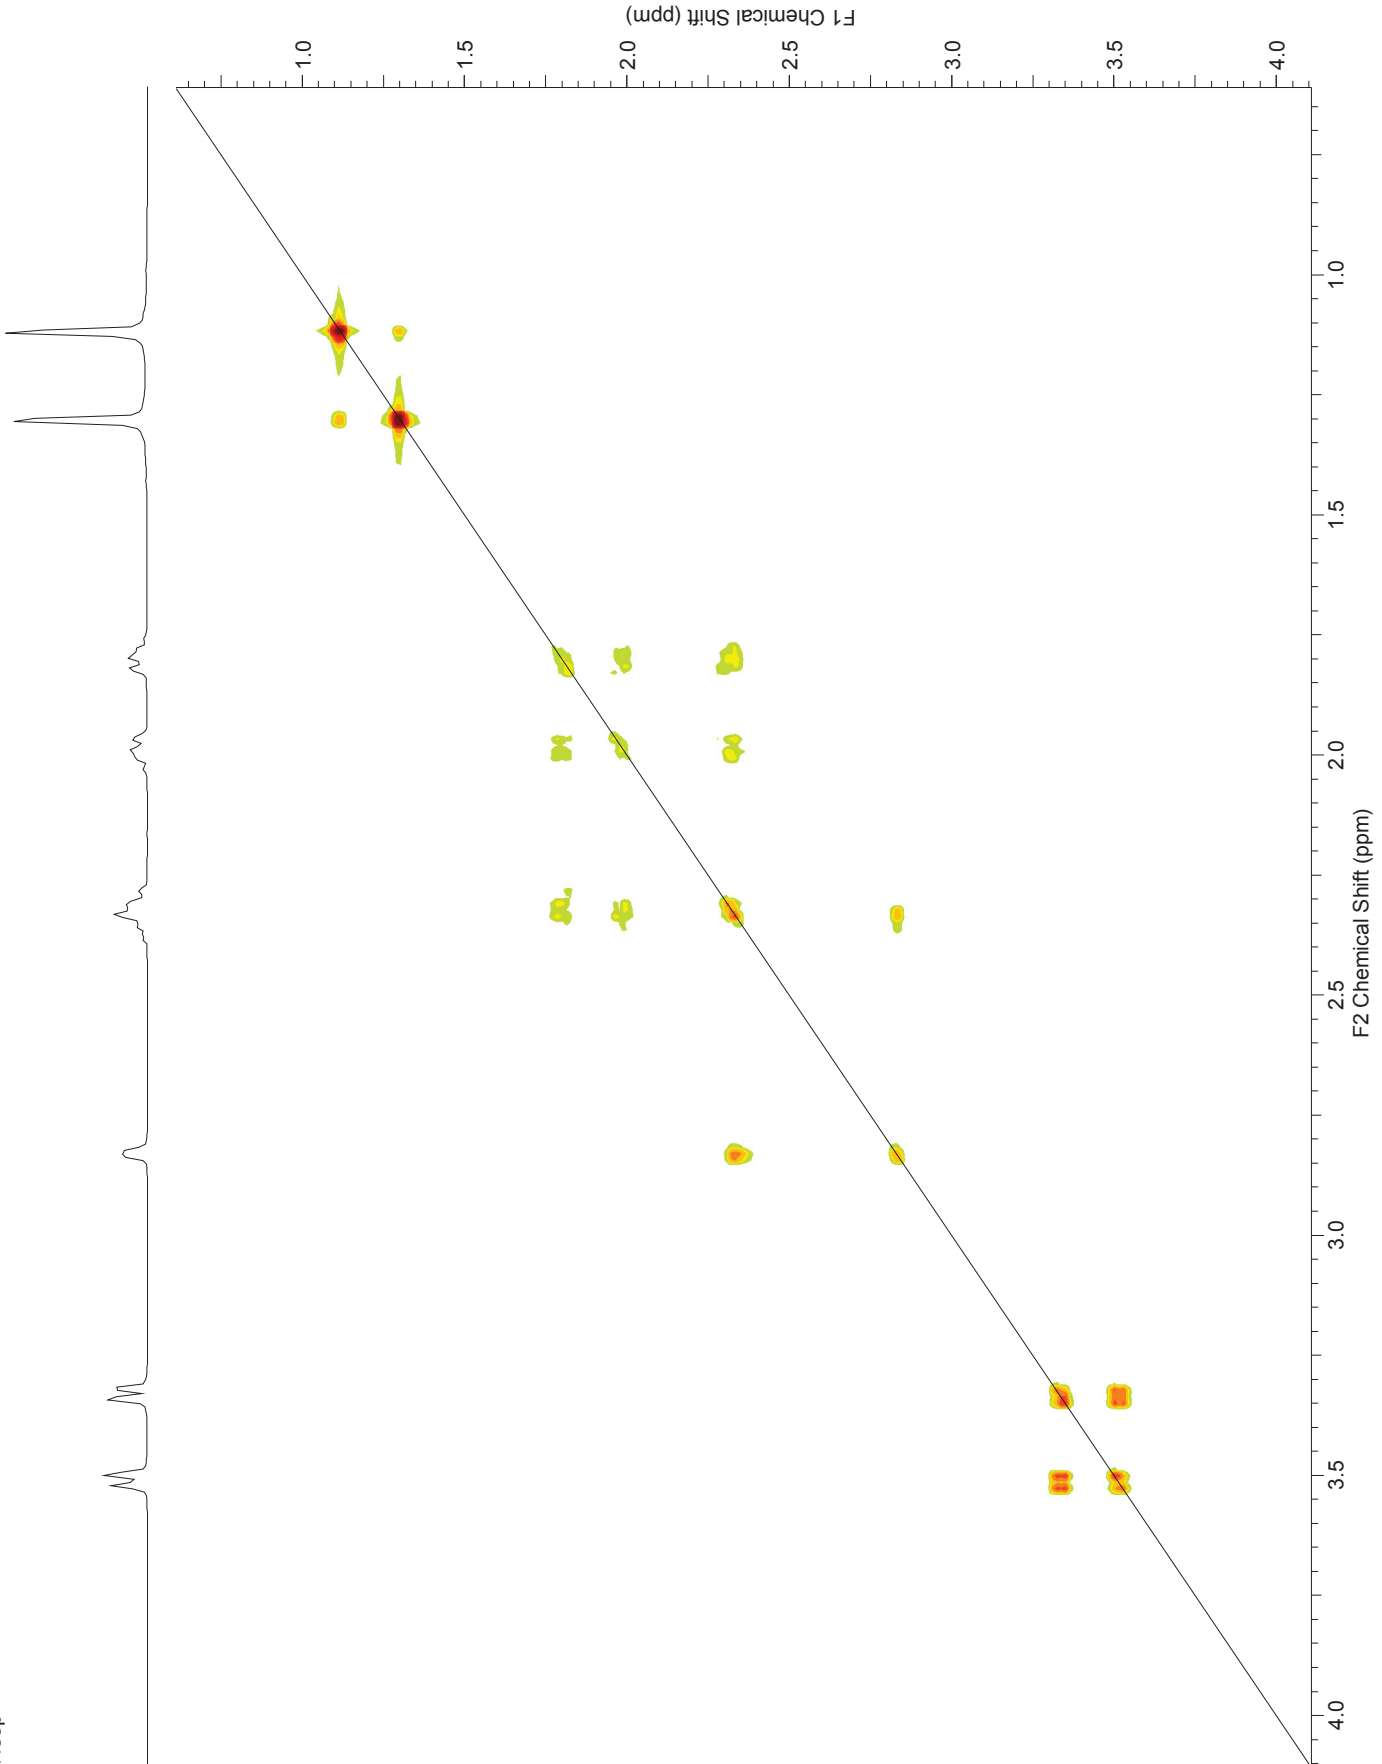

10-methacryloyloxycamphorquinone\_1H.esp

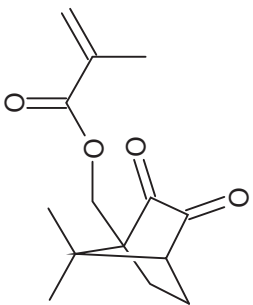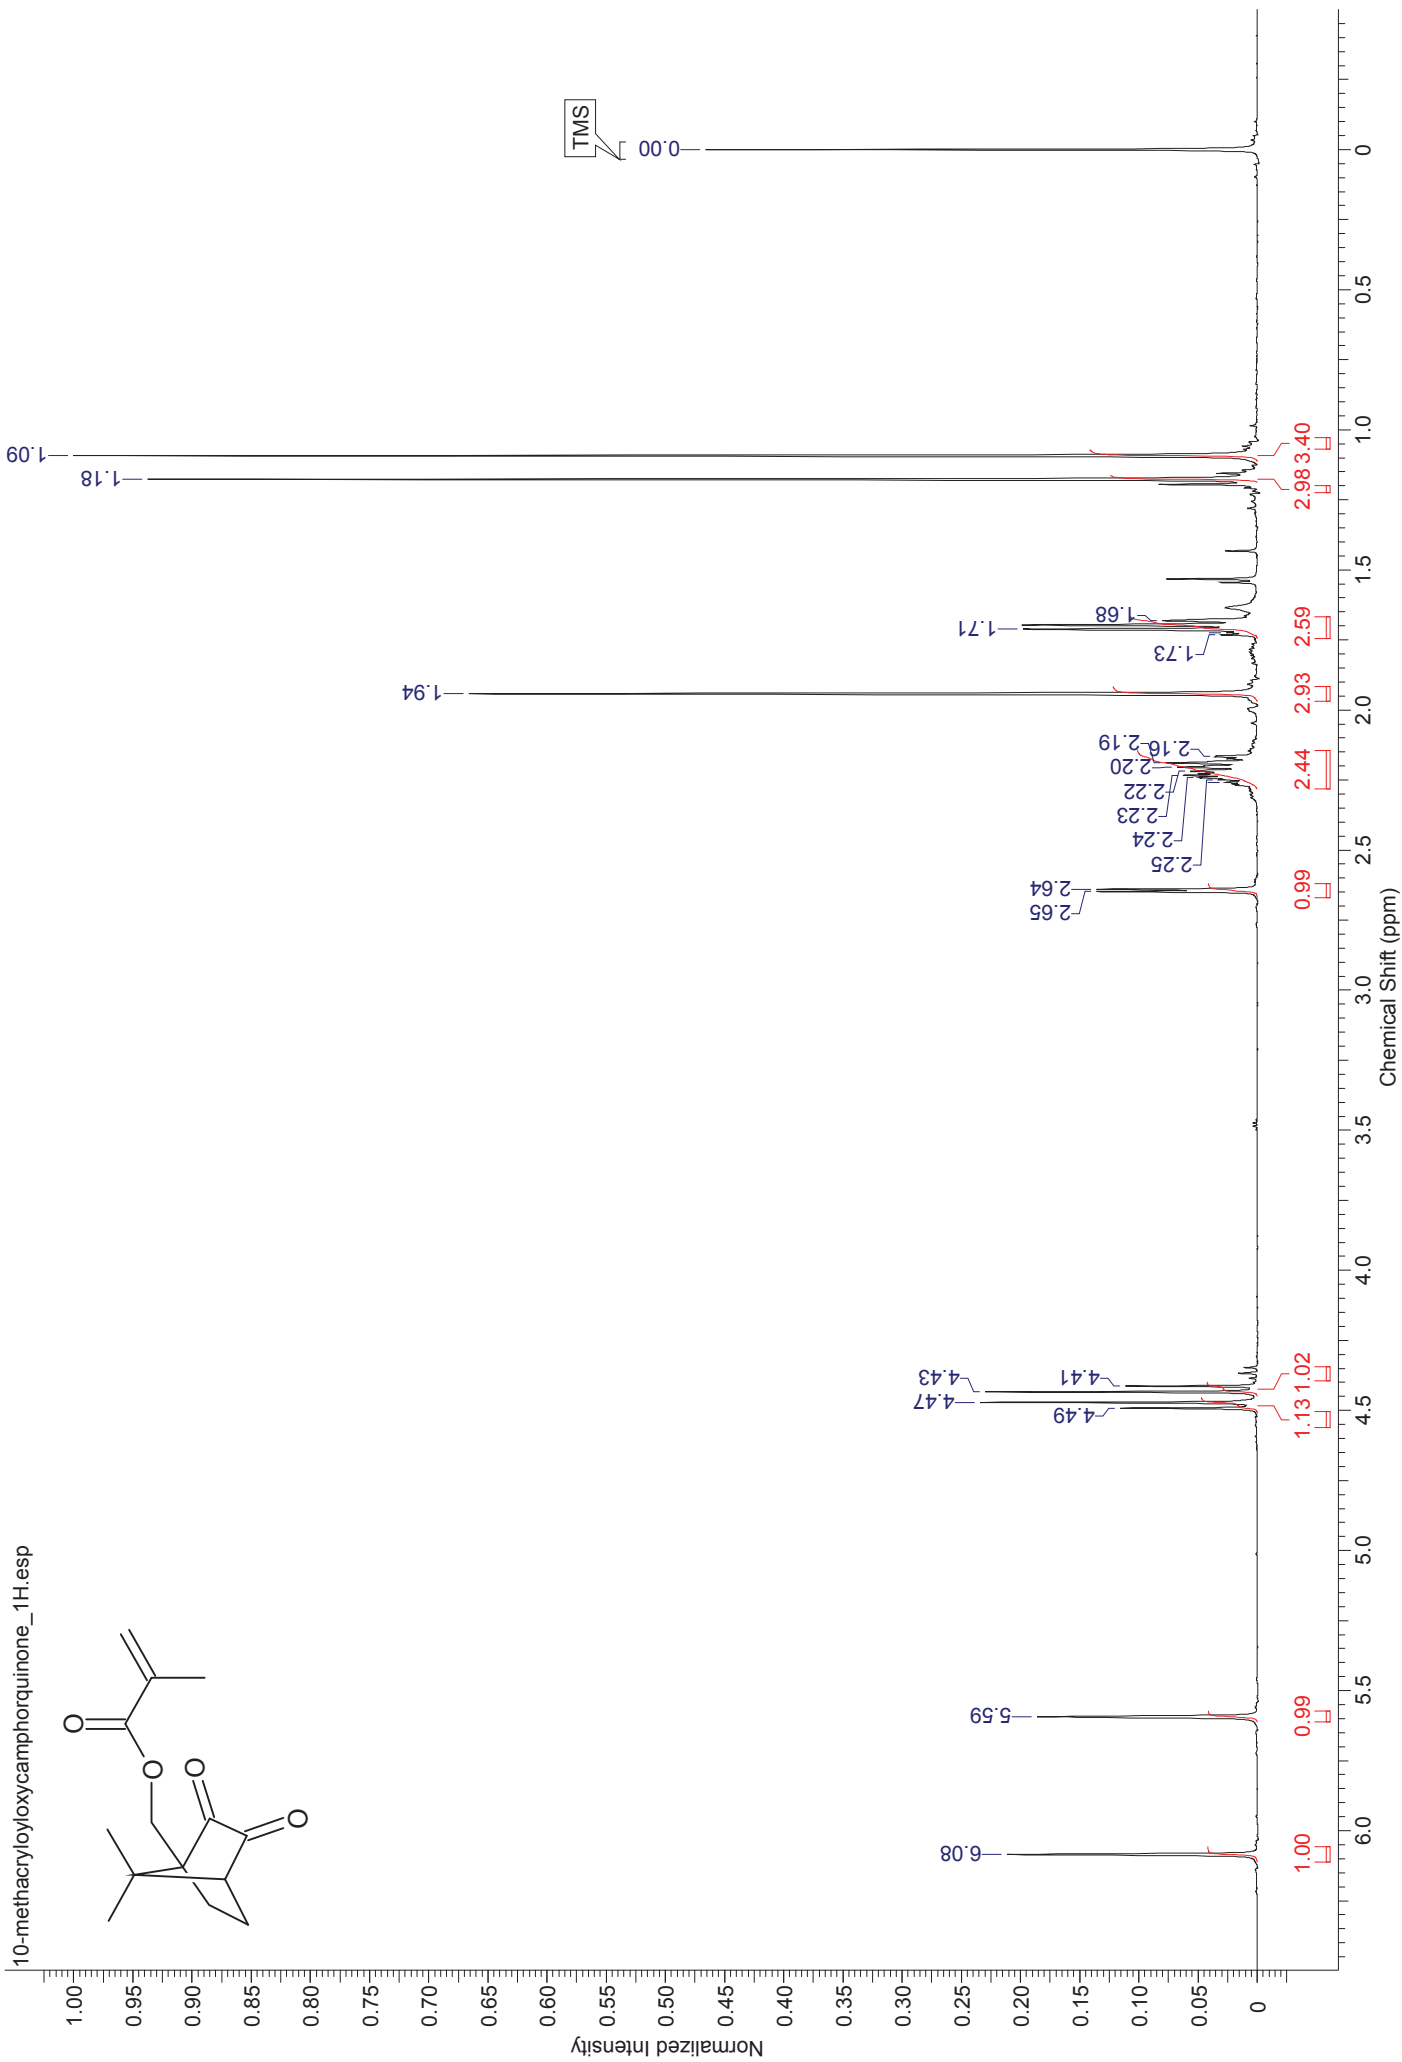

10-methacryloyloxycamphorquinone\_13C.esp

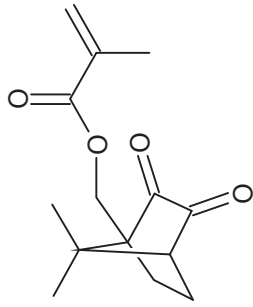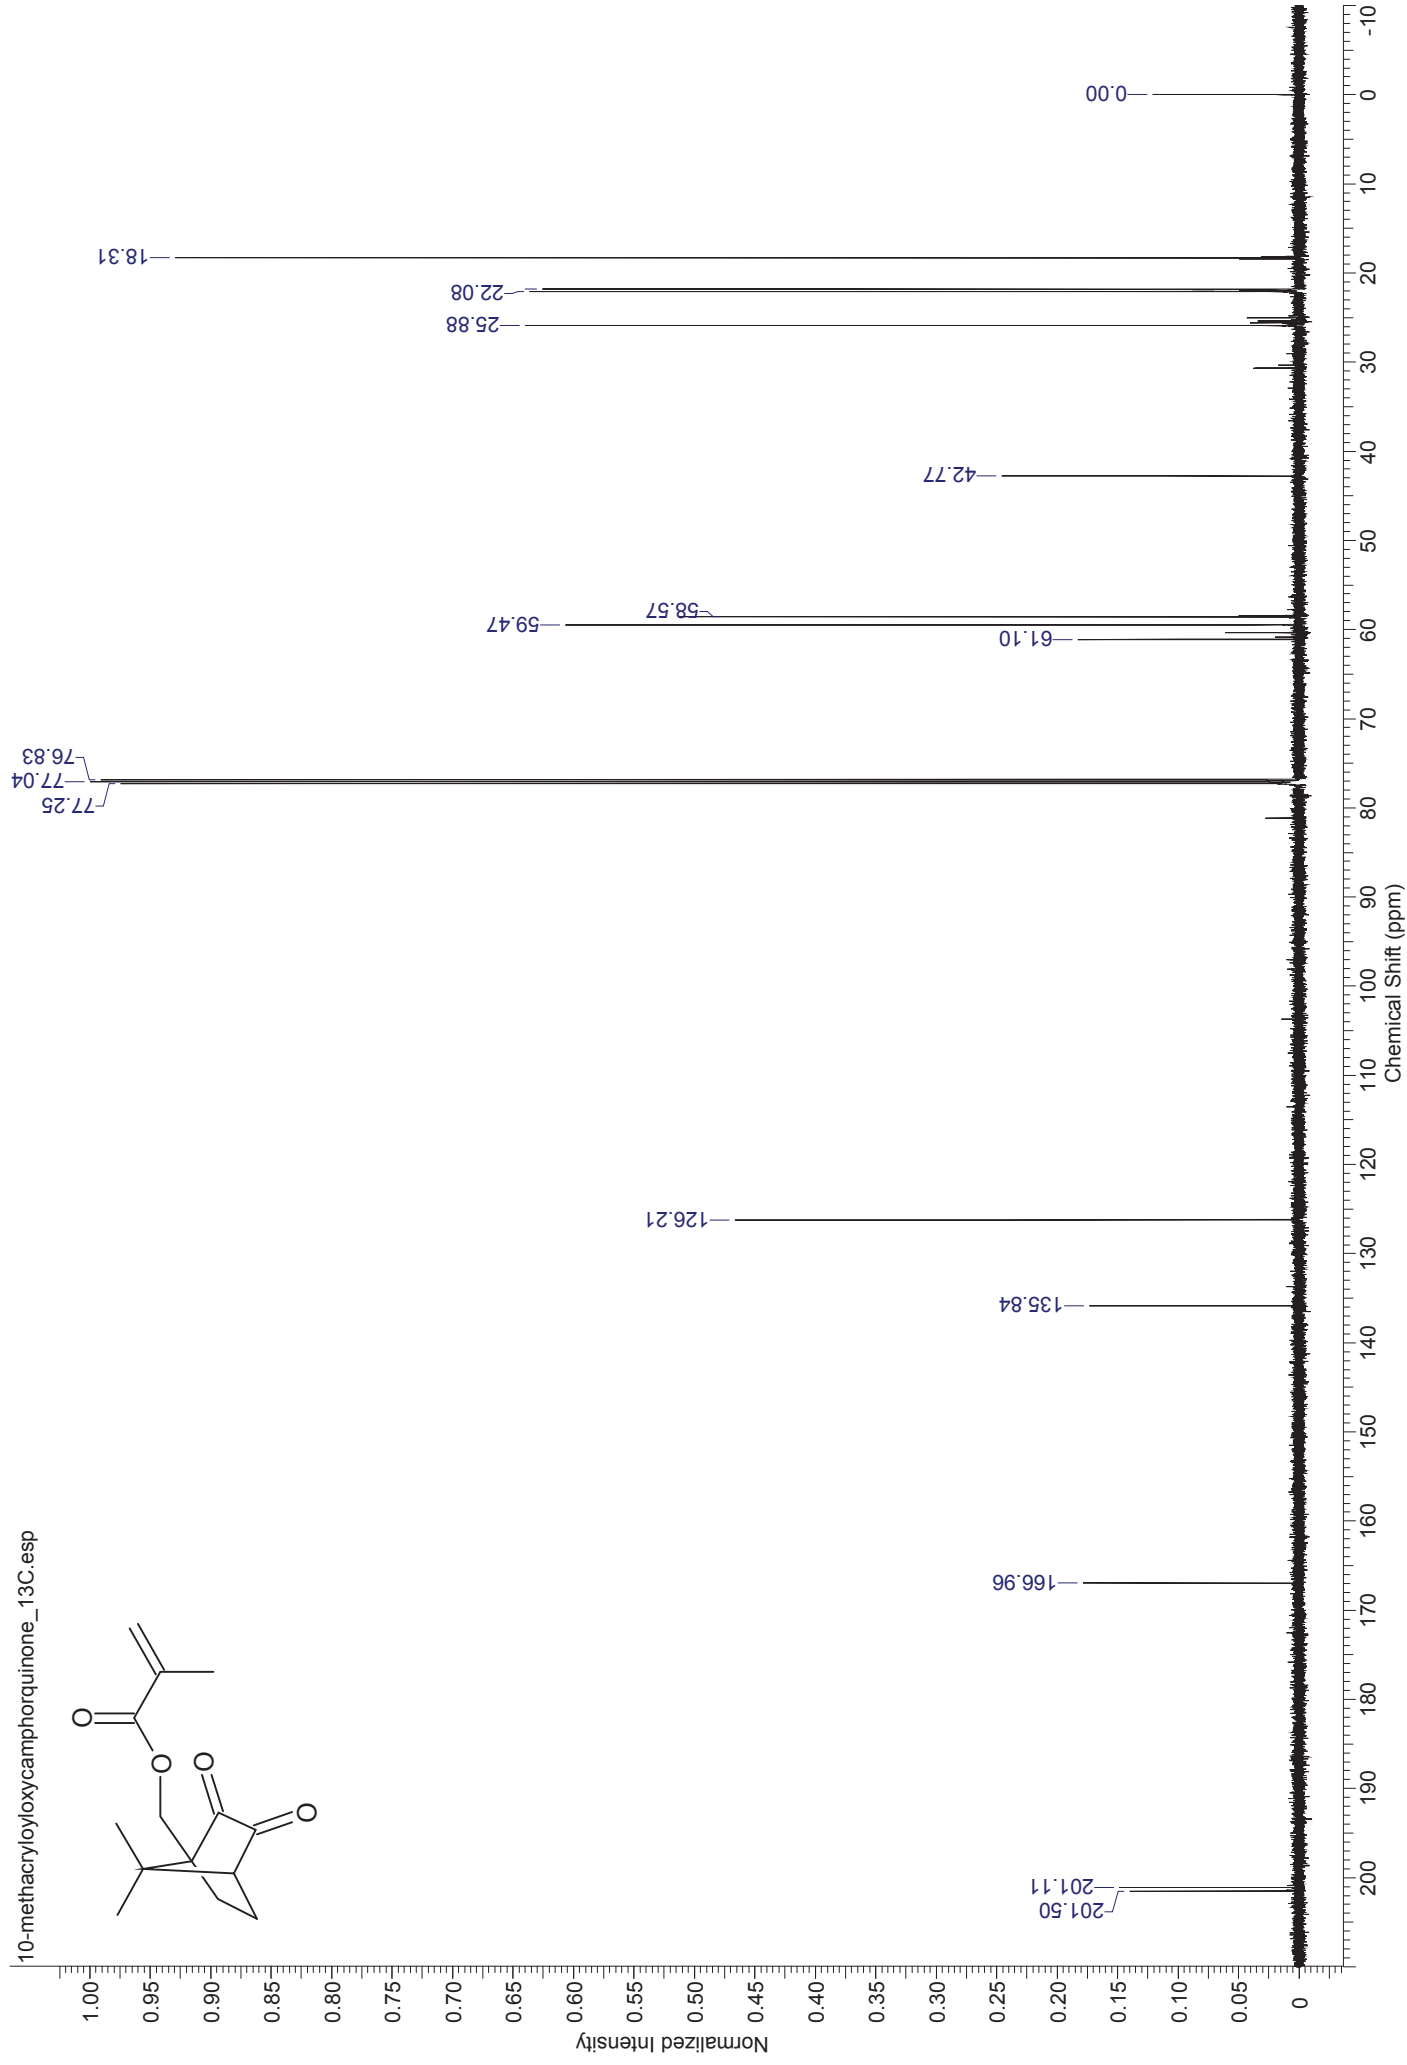

byproduct\_1H.esp

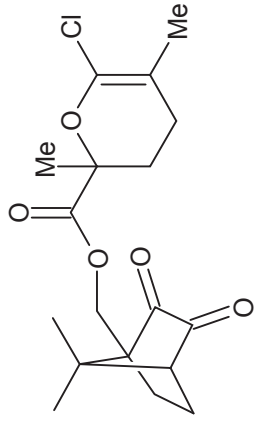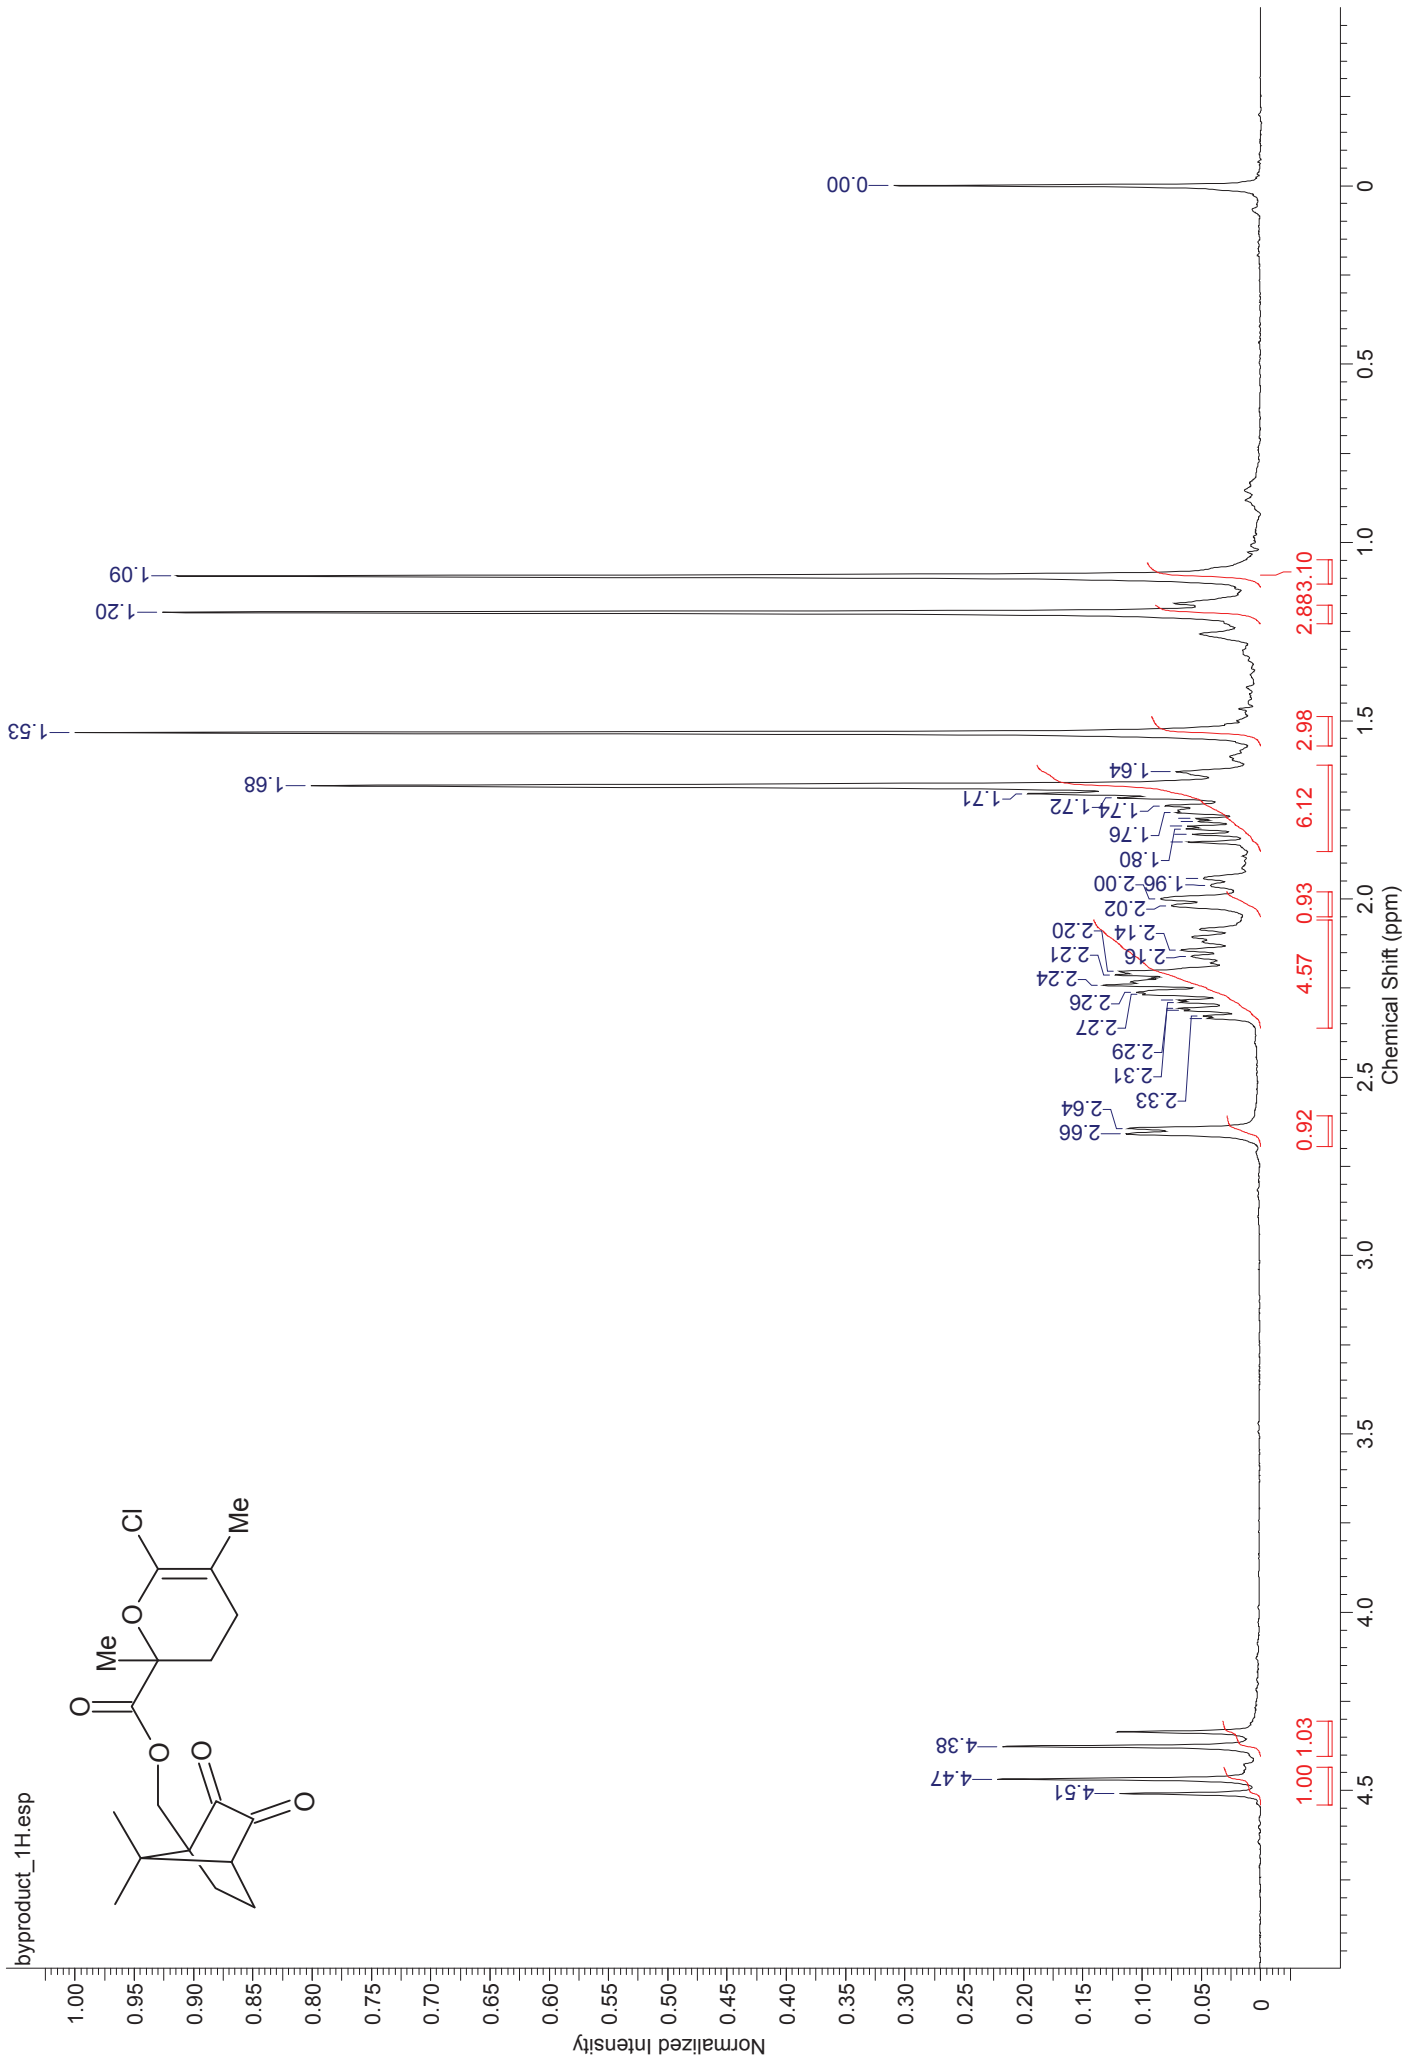

byproduct\_13C.esp

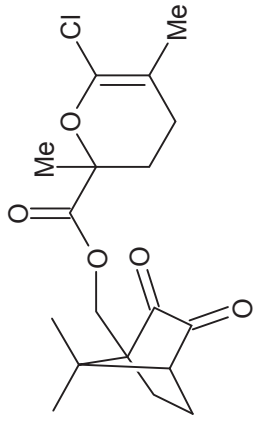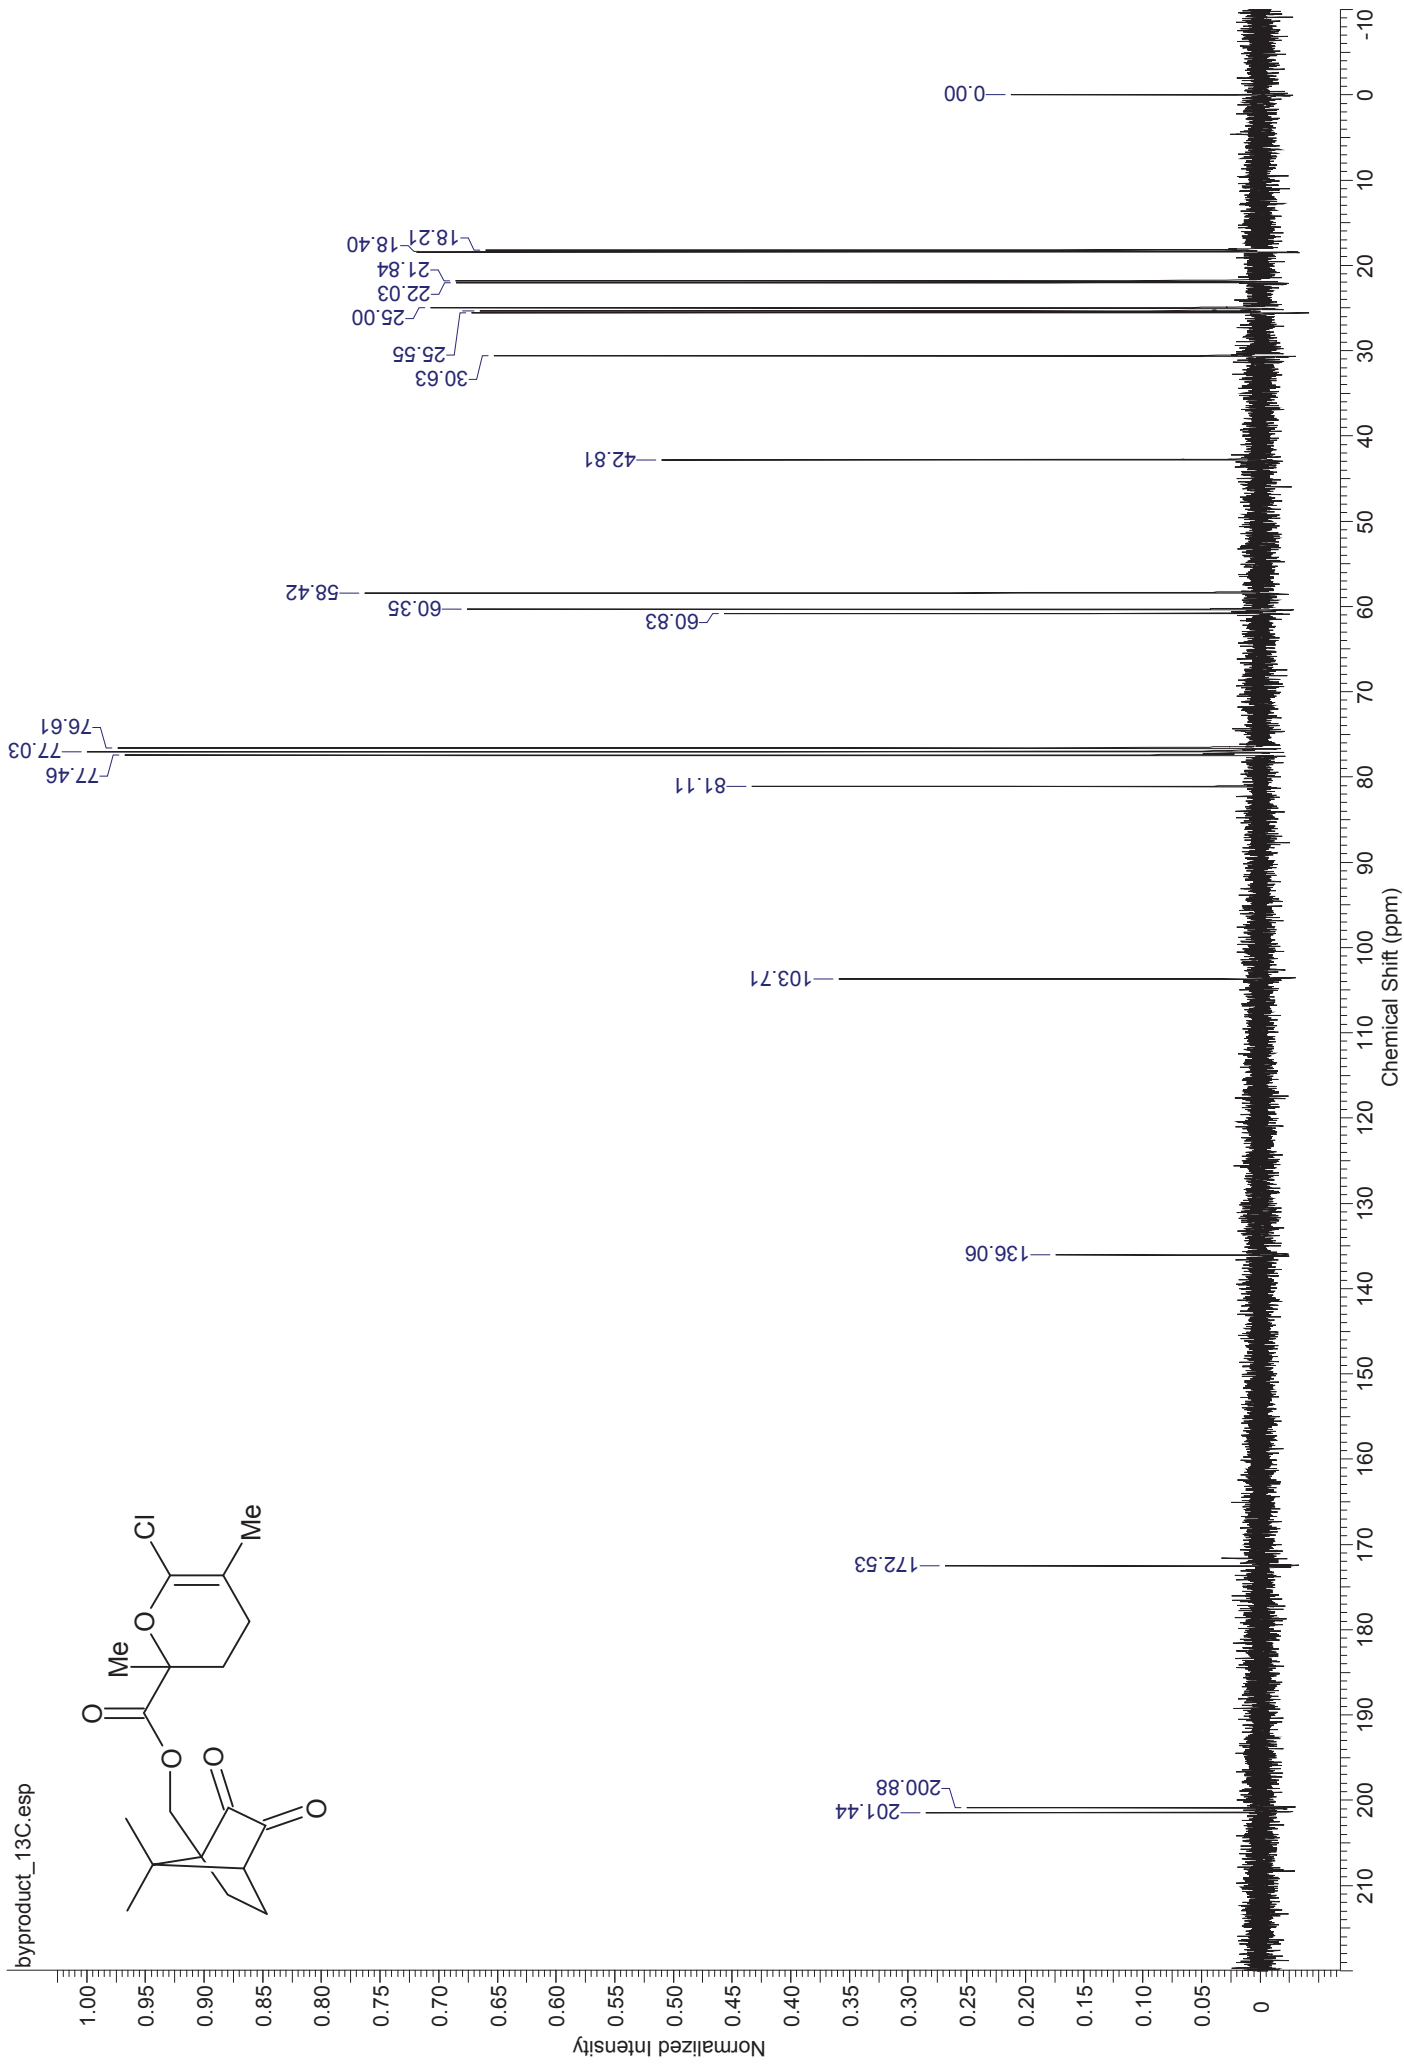

Supplement: Additional file 2 [file 1860-5397-8-37-S2.pdf]
